1 The Atypical Rho GTPase CHW-1 Works With SAX-3/Robo to Mediate Axon  
2 Guidance in *Caenorhabditis elegans*

3

4

5 Jamie K. Alan<sup>†\*</sup>, Sara Robinson<sup>§</sup>, Katie Magsig<sup>§</sup>, Rafael S. Demarco<sup>‡1</sup>, and Erik  
6 A. Lundquist<sup>‡</sup>

7

13 <sup>†</sup>Department of Pharmacology and Toxicology; Michigan State University; East  
14 Lansing, MI USA 48824

15 <sup>§</sup>College of Medicine; Central Michigan University; Mount Pleasant, MI USA  
16 48859

17 <sup>‡</sup>Department of Molecular Biosciences; University of Kansas; Lawrence, KS USA  
18 60045

19

20 \*Corresponding Author

21

22 <sup>1</sup>Department of Molecular, Cell, and Developmental Biology; UCLA; Los Angeles,  
23 CA 90095

24

1 Running title: CHW-1 regulates axon guidance downstream of SAX-3/ROBO

2

3 Key Words: CHW-1, SAX-3/Robo, axon pathfinding, CRP-1, CDC-42

4

5 Corresponding Author:

6

7 Jamie K. Alan RPh, PharmD PhD

8 Department of Pharmacology and Toxicology

9 Michigan State University

10 1355 Bogue St

11 Life Sciences Building

12 Rm B305

13 East Lansing, MI

14 48824

15

16

1 **ABSTRACT**

2

3 During development, neuronal cells extend an axon towards their target  
4 destination in response to a cue to form a properly functioning nervous system.  
5 Rho proteins, Ras-related small GTPases that regulate cytoskeletal organization  
6 and dynamics, cell adhesion, and motility, are known to regulate axon guidance.  
7 Despite extensive knowledge about canonical Rho proteins (RhoA/Rac1/Cdc42),  
8 little is known about the *Caenorhabditis elegans* (*C. elegans*) atypical Cdc42-like  
9 family members CHW-1 and CRP-1 in regards to axon pathfinding and neuronal  
10 migration. *chw-1*(Chp/Wrch) encodes a protein that resembles human Chp  
11 (Wrch-2/RhoV) and Wrch-1 (RhoU), and *crp-1* encodes for a protein that  
12 resembles TC10 and TCL. Here, we show that *chw-1* works redundantly with *crp-*  
13 *1* and *cdc-42* in axon guidance. Furthermore, proper levels of *chw-1* expression  
14 and activity are required for proper axon guidance. When examining CHW-1  
15 GTPase mutants, we found that the native CHW-1 protein is likely partially  
16 activated, and mutations at a conserved residue (position 12 using Ras  
17 numbering, position 18 in CHW-1) alter axon guidance and neural migration.  
18 Additionally, we showed that *chw-1* genetically interacts with the guidance  
19 receptor *sax-3* in PDE neurons. Finally, in VD/DD motor neurons, *chw-1* works  
20 downstream of *sax-3* to control axon guidance. In summary, this is the first study  
21 implicating the atypical Rho GTPases *chw-1* and *crp-1* in axon guidance.  
22 Furthermore, this is the first evidence of genetic interaction between *chw-1* and

- 1 the guidance receptor *sax-3*. These data suggest that *chw-1* is likely acting
- 2 downstream and/or in parallel to *sax-3* in axon guidance.
- 3

## INTRODUCTION

1  
2  
3  
4  
5  
6  
7  
8  
9  
10  
11  
12  
13  
14  
15  
16  
17  
18  
19  
20  
21  
22  
23

During proper development of the nervous system, neurons must first migrate to their final position where they then extend axons in order to establish synaptic connections. In order to first migrate and then extend an axon, the neuronal cells must undergo dynamic changes in their actin cytoskeleton migration (Tessier-Lavigne and Goodman 1996) (Dickson 2002; Gallo and Letourneau 2002). Many studies have shown that Rho proteins are required for actin cytoskeleton rearrangement and subsequent neuronal migration and axon extension (Lundquist 2003; Luo 2000; Dickson 2001). Rho family proteins are Ras-related small GTPases that regulate cytoskeletal organization and dynamics, cell adhesion, motility, trafficking, proliferation, and survival (Etienne-Manneville and Hall 2002). Misregulation of Rho proteins can result in defects in cell proliferation, cell adhesion, cell morphology, and cell migration (Ridley 2004). These proteins function as tightly regulated molecular switches, cycling between an active GTP-bound state and an inactive GDP-bound state (Jaffe and Hall 2005). Despite extensive knowledge about regulation and function of the canonical Rho proteins (RhoA/Rac1/Cdc42), little is known about the contribution of the *Caenorhabditis elegans* (*C. elegans*) atypical Cdc42-like family members CHW-1 and CRP-1 to axon pathfinding and neuronal migration. *C. elegans* contains a single gene, *chw-1* which encodes a protein that resembles human Chp (Wrch-2/RhoV) and Wrch-1 (RhoU), and *crp-1* encodes for a protein that resembles TC10 and TCL.

1 While *chw-1* has not been studied in the context of axon pathfinding, it has been  
2 implicated in cell polarity, working with LIN-18/Ryk and LIN-17/Frizzled(Kidd et al.  
3 2015). Additionally, there is a body of literature concerning the related  
4 mammalian homologues Wrch-1 (Wnt-regulated Cdc42 homolog-1, RhoU) and  
5 Chp (Wrch-2/RhoV), the most recently identified Rho family members. Wrch-1  
6 and Chp share 57% and 52% sequence identity with Cdc42, respectively, and  
7 61% sequence identity with each other (Tao et al. 2001; Aronheim et al. 1998).  
8 Wrch-1 and Chp are considered atypical GTPases for a number of reasons.  
9 Atypical Rho proteins vary in either their regulation of GTP/GDP-binding, the  
10 presence of other domains besides the canonical Rho insert domain, and  
11 variances in their N- and C-termini and/or posttranslational modifications. When  
12 compared to the other members of the Cdc42 family, Wrch-1 has elongated N-  
13 terminal and C-terminal extensions. The N-terminus of Wrch-1 has been shown  
14 to be an auto-inhibitory domain, and removal of the N-terminus increases the  
15 biological activity of the protein (Shutes et al. 2004; Shutes et al. 2006; Berzat et  
16 al. 2005). The N-termini of both Wrch-1 and Chp contain PxxP motifs, which may  
17 mediate interactions with proteins containing SH3 domains, such as the adaptor  
18 proteins Grb2 and Nck (Zhang et al.). Wrch-1 is also divergent in the C-terminus,  
19 when compared to other members of the Cdc42 family. Like Chp (Chenette et al.  
20 2006), instead of being irreversibly prenylated on a CAAX motif, Wrch-1 is  
21 reversibly palmitoylated on a CFV motif (Berzat et al. 2005). This reversible  
22 modification may lead to more dynamic regulation of the protein.  
23

1 Although Wrch-1 shares sequence identity with Cdc42 and Chp-1, Wrch-1  
2 shares only partially overlapping localization and effector interactions with these  
3 proteins, and its activity is regulated in a distinct manner. Like Cdc42, Wrch-1  
4 activity leads to activation of PAK1 and JNK (Chuang et al. 2007; Tao et al. 2001),  
5 formation of filopodia (Ruusala and Aspenstrom 2008; Saras et al. 2004), and both  
6 morphological (Brady et al. 2009) and growth transformation in multiple cell types  
7 (Berzat et al. 2005; Brady et al. 2009). In addition, Wrch-1 also regulates focal  
8 adhesion turnover (Chuang et al. 2007; Ory et al. 2007), negatively regulates the  
9 kinetics of tight junction formation (Brady et al. 2009), plays a required role in  
10 epithelial morphogenesis (Brady et al. 2009), modulates osteoclastogenesis  
11 (Brazier et al. 2009; Ory et al. 2007; Brazier et al. 2006), and regulates neural  
12 crest cell migration (Faure and Fort 2011). Chp/Wrch-2, a protein highly related  
13 to Wrch-1, was identified in a screen that was designed to look for proteins that  
14 interact with p21-activated kinase (Pak1) (Aronheim et al. 1998). Like Wrch-1,  
15 Chp also contains N- and C-terminal extensions when compared to Cdc42 and  
16 the N-terminus auto-inhibitory domain (Shutes et al. 2004; Chenette et al. 2005).  
17 Also like Wrch-1, active Chp leads to cell transformation (Chenette et al. 2005),  
18 signals through PAK (PAK6) (Shepelev and Korobko 2012) and JNK (Shepelev  
19 et al. 2011), and is involved in neural crest cell specification and migration (Faure  
20 and Fort 2011; Guemar et al. 2007).

21

22 While the GTPase domain of CHW-1 is highly similar to human Wrch-1 and  
23 Chp/Wrch-2, it is divergent in its N- and C-terminus. The N-terminal extension

1 found in both Wrch-1 and Chp/Wrch-2, which regulates the function of these  
2 proteins, is absent in CHW-1. Additionally, CHW-1 lacks any C-terminal lipid  
3 modification motif, such as a CXX motif found in Wrch-1 and Chp/Wrch-1,  
4 suggesting that it does not require membrane targeting for its function. While  
5 CHW-1 bears some sequence identity to both Wrch-1, Chp/Wrch-1 and Cdc42, it  
6 is most similar to human Wrch-1(Kidd et al. 2015).

7

8 The *C. elegans* protein CRP-1, a member of the Cdc42 subfamily, shares  
9 sequence identity, possess atypical enzymatic activity and possesses similar  
10 functions to the mammalian GTPases TC10 and TCL (Aspenstrom et al. 2004;  
11 de Toledo et al. 2003; Michaelson et al. 2001; Murphy et al. 2001; Murphy et al.  
12 1999; Jenna et al. 2005; Vignal et al. 2000). Interestingly, like CRP-1, TC10 and  
13 TCL localize at internal membranes (Michaelson et al. 2001; Aspenstrom et al.  
14 2004; Vignal et al. 2000; Jenna et al. 2005). Also, like CRP-1, TC10 and TCL  
15 mediate cellular trafficking (Jenna et al. 2005; Okada et al. 2008; de Toledo et al.  
16 2003). However, unlike the rest of the Cdc42 family members, overexpression of  
17 CRP-1 was unable to induce cytoskeletal changes in mouse fibroblasts,  
18 suggesting that CRP-1 may have overlapping and unique functions compared to  
19 other Cdc42 family members (Jenna et al. 2005). Indeed, unlike other Cdc42  
20 family members, *crp-1* is an essential component for UPR-induced transcriptional  
21 activities. *crp-1* mediates this processes through physical and genetic  
22 interactions with the AAA+ ATPase CDC-48 (Caruso et al. 2008).

23



1 Because members of the Rho family have many overlapping functions, in  
2 addition to their unique functions, we hypothesized that atypical Rho GTPases,  
3 like the other Rho family small GTPases, may contribute to axon guidance. To  
4 test this hypothesis, we genetically characterized the *C. elegans* atypical Rho  
5 GTPases *chw-1* and *crp-1*, in axon pathfinding. We found the *chw-1* works  
6 redundantly with *crp-1* and *cdc-42* in axon guidance. Next, we examined CHW-1  
7 GTPase mutants. Most GTPases have a conserved glycine at position 12 (using  
8 Ras numbering). However, CHW-1 possesses an alanine at this conserved  
9 position (position 18 in CHW-1), which is predicted to be partially activating. We  
10 found that ectopic expression of either CHW-1, CHW-1(A18V) and CHW-  
11 1(A18G) caused axon guidance defects, suggesting proper expression and  
12 activity levels of CHW-1 are required for proper axon guidance. The A18V  
13 mutation is predicted to be activating, and the A18G mutation is predicted to  
14 reduce function. Furthermore, we observed that an activated version of CHW-1  
15 (CHW-1(A18V)) resulted in formation of ectopic lamellipodia, similar to activated  
16 versions of other Rho proteins such as MIG-2, CED-10, and CDC-42. These data  
17 suggest that, like other Rho GTPases and their mammalian counterparts, CHW-1  
18 is likely modulating the actin cytoskeleton to regulate axon pathfinding. When  
19 examining the CHW-1(A18G) mutant, we found that it displayed anteriorly  
20 displaced amphid neuron cell bodies. This phenotype is similar to a loss-of-  
21 function *sax-3* phenotype. Therefore, we hypothesized that *chw-1* may  
22 genetically interact with *sax-3* in axon guidance. Indeed, we found that *chw-1*  
23 does genetically interact with *sax-3* in the amphid and PDE neurons.

1 Furthermore, we were able to show that loss of *chw-1* attenuates axon  
2 pathfinding defects driven by activated SAX-3 in VD/DD motor neurons. These  
3 data suggest that *chw-1* is likely acting downstream and/or in parallel to *sax-3* in  
4 axon guidance.

5  
6 In summary, this is the first study characterizing the role of the *C. elegans*  
7 atypical Rho GTPases in axon guidance. We found that *chw-1* is acting  
8 redundantly with *crp-1* and *cdc-42* in axon guidance. Like other Rho GTPases,  
9 CHW-1 is involved in axon guidance, and it works redundantly with CRP-1 and  
10 CDC-42 in this context. Furthermore, we showed that *chw-1* interacts genetically  
11 with the guidance receptor *sax-3* in axon guidance.

## 12 13 MATERIALS AND METHODS

14  
15 ***C. elegans* genetics and transgenics.** *C. elegans* were cultured using  
16 standard techniques (Brenner 1974; J and J 1988). All of the experiments were  
17 done at 20°C, unless otherwise noted. Transgenic worms were made by gonadal  
18 micro-injection using standard techniques (Mello and Fire 1995). RNAi was done  
19 using clones from the Ahringer library, as previously described (Kamath and  
20 Ahringer 2003). The following mutations and constructs were used in this work:  
21 LGI- *unc-40(n324)*; LGII- *cdc-42(gk388)*, *mln1*; LGV- *chw-1(ok697)*, *crp-*  
22 *1(ok685)*; LGX- *sax-3(ky123)*, *unc-6(ev400)*, *lqls2 (osm-6::gfp)*; LG unassigned-

1 *osm-6::chw-1::gfp*, *osm-6::chw-1(A18G)::gfp*, *osm-6::chw-1(A18V)::gfp*, *unc-*  
2 *25::myr::sax-3*.

3

4 The mutants were maintained as homozygous stocks, when possible. In some  
5 cases, this was not possible because the double mutants were lethal or  
6 maternal-lethal, and thus could not be maintained as homozygous stocks. If this  
7 was the case, the mutation was maintained in a heterozygous state over a  
8 balancer chromosome. *cdc-42(gk388)* was balanced by *mln1*, which harbors a  
9 transgene that drives *gfp* expression in the pharynx. *cdc-42(gk388)* homozygotes  
10 were identified by lack of pharyngeal green fluorescent protein (GFP).

11

12 **Scoring of PDE and VD/DD axon defects.** Axon pathfinding defects were  
13 scored in the fourth larval stage (L4) or in young pre-gravid adult animals  
14 harboring green fluorescent protein (*gfp*), which was expressed in specific cell  
15 types. In the event that the animals did not survive to this stage, they were  
16 counted at an earlier stage with appropriate controls. The PDE neurons and  
17 axons were visualized in cells that had an *osm-6::gfp* transgene (*lqls2 X*), which  
18 is expressed in all ciliated neurons including the PDE. A PDE axon was  
19 considered to be misguided if it failed to extend an axon directly to the ventral  
20 nerve cord (VNC). If the trajectory of the axon was greater than a 45° angle from  
21 the wild-type position, the axon was scored as misguided, whether it eventually  
22 reached the VNC or not. The neurons were considered to have ectopic

1 lamellipodia if they had a lamellipodia-like structure protruding from anywhere on  
2 the cell body, axon, or dendrite.

3

4 The VD/DD motor neuron morphology was scored in animals that had an *unc-*  
5 *25::gfp* transgene (*juls76 II*)(Jin et al. 1999). The *unc-25* promoter is turned on in  
6 all GABAergic neurons, including the VDs and DDs. In wild-type animals, the  
7 VD/DD commissures extend directly from the VNC toward the dorsal surface of  
8 the animals. At the dorsal surface, they form the dorsal nerve cord. Aberrant  
9 VD/DD pathfinding was noted when the commissural axons were misguided or  
10 terminated prematurely.

11

12 **Molecular biology.** The CHW-1 constructs were subcloned from cDNA in a pBS  
13 (bluescript) vector backbone, which were a generous gift from Dr. Ambrose Kidd,  
14 who made these constructs while in the laboratories of Dr. Adrienne Cox and Dr.  
15 Channing Der (UNC-Chapel Hill) in collaboration with Dr. Dave Reiner (Texas  
16 A&M). Recombinant DNA, polymerase chain reaction (PCR), and other  
17 molecular biology techniques were performed using standard procedures  
18 (Sambrook J. 1989). All primer sequences used in the PCR reactions are  
19 available upon request.

20

21 **Microscopy and imaging.** The animals used for the imaging analyses were  
22 mounted for microscopy in a drop of M9 buffer on an agarose pad (J and J  
23 1988). Both the buffer and the agarose pad contained 5 mM sodium azide, which

1 was used as an anesthetic. Then, a coverslip was placed over the sample, and  
2 the slides were analyzed by epifluorescence for GFP. A Leica DMRE microscope  
3 with a Qimaging Rolera MGi EMCCD camera was used, along with Metamorph  
4 and ImageJ software.

5

6 **Data availability.** Strains are available upon request.

7

8

## RESULTS

9

10 ***chw-1* acts redundantly with *cdc-42* and *crp-1* in axon guidance.** As  
11 previously described (Kidd et al. 2015), the *C. elegans* genome contains a single  
12 gene, F22E12.1, which encodes CHW-1, the *C. elegans* ortholog of human  
13 Chp/Wrch-1. The core effector domain of CHW-1 is most similar to human Wrch-  
14 1, and is considerably variant from human Chp. The N- and C-termini are  
15 considerably different than either human ortholog. While both Wrch-1 and Chp  
16 have an N-terminal extension that negatively regulates the protein, this domain is  
17 almost entirely absent in Chw-1 (Figure 1). While most Rho proteins terminate in  
18 a CAAX motif that signals for an irreversible prenyl lipid modification, both Wrch-  
19 1 and Chp end in a CXX motif and are modified by a reversible palmitate  
20 modification, which is required for their membrane localization and biological  
21 activity (Berzat et al. 2005; Chenette et al. 2005). However, CHW-1 lacks a  
22 CAAX or a CXX motif and presumably does not require membrane targeting for  
23 its function (Figure 1). Given these differences, we sought to determine the role

1 of *chw-1* in axon guidance. The human orthologs of CHW-1 are in the Cdc42  
2 family of Rho proteins, and in mammalian systems, the Cdc42 family of proteins  
3 (Cdc42, Wrch-1, Chp, TC10, and TCL) work in concert to carry out both unique  
4 and redundant functions. While CHW-1 is the *C. elegans* ortholog of Wrch-1 and  
5 Chp, CRP-1 closely resembles TC10 and TCL in both sequence and function  
6 (Caruso et al. 2008; Jenna et al. 2005). Therefore, we first sought to determine  
7 whether *chw-1* works redundantly with *crp-1* and/or *cdc42* in axon guidance. For  
8 these assays, we visualized the morphology and position of the PDE axons. *C.*  
9 *elegans* has two bilateral PDE neurons that are located in the post-deirid ganglia  
10 of the animal. In the wild-type N2 strain, PDE neurons extend their axons  
11 ventrally in a straight line from the cell body to the ventral nerve cord. When the  
12 axon reaches the ventral cord, it then branches and extends towards both the  
13 anterior and the posterior. To visualize the neurons, we used a transgene gene  
14 (*lqls2; osm-6::gfp*) expressed in the PDE neurons. The *osm-6* promoter is  
15 expressed in all ciliated sensory neurons including the PDE neurons (Collet et al.  
16 1998). We observed that alone, deletion alleles or RNAi against *chw-1*, *crp-1*, or  
17 *cdc-42* produced very few axon guidance defects (Figure 2). However, when two  
18 or more of these genes were knocked out by either a deletion allele or RNAi we  
19 observed a synergistic increase in axon guidance defects (up to 50%).  
20 Furthermore, when all 3 genes were knocked out the axon guidance defects  
21 increased to 70%. Taken together, these genetic data suggest that *chw-1*, *crp-1*,  
22 and *cdc42* act redundantly in PDE axon guidance.  
23

1 **Proper expression and activity levels of CHW-1 are required for axon**  
2 **guidance.** Ras superfamily GTPases, including the Rho-family GTPases, cycle  
3 between active GTP-bound forms and inactive GDP bound forms driven by the  
4 intrinsic GTPase activity of the molecules. The glycine 12 to valine (G12V)  
5 substitution has been previously shown to result in inhibition of the intrinsic  
6 GTPase activity of the GTPase, favoring the active, GTP-bound state  
7 (Wittinghofer et al. 1991). The G12V mutation also makes the protein insensitive  
8 to GTPase activating proteins (GAPs) (Ahmadian et al. 1997), rendering the  
9 protein constitutively GTP-bound and active. Most Rho proteins harbor a glycine  
10 at position 12, however CHW-1 possesses an alanine at this conserved position  
11 (position 18 in CHW-1), which is predicted to be a partially activating, resulting in  
12 greater GTP-bound levels and an increase in activity. Indeed, evidence from  
13 other labs suggests that the native CHW-1 protein may be partially constitutively  
14 active (Kidd et al. 2015). We found that transgenic expression of CHW-1, CHW-  
15 1(A18V), and CHW-1(A18G) all caused axon guidance defects to a very similar  
16 degree (24%, 23%, and 29%, respectively) (Figure 3). This evidence suggests  
17 that, like the mammalian counterpart Wrch-1, proper levels of CHW-1 activity are  
18 required for correct axon guidance (Alan et al. ; Brady et al. 2009). In other  
19 words, too much or too little activity of CHW-1 results in an aberrant outcome  
20 (misguided axons).

21

22 **Expression of CHW-1(A18V) results in the formation of ectopic lamellipodia**  
23 **in PDE neurons.** Previously, our lab showed that expression of the Rac

1 GTPases CED-10 and MIG-2 harboring the G12V mutation in neurons *in vivo*  
2 resulted in the formation of ectopic lamellipodial and filopodial protrusions  
3 (Struckhoff and Lundquist 2003), and that CDC-42(G12V) expression caused  
4 similar lamellipodial and filopodial protrusions (Demarco and Lundquist).  
5 Therefore, we sought to determine whether a similar mutation at this conserved  
6 residue, CHW-1(A18V), also resulted in ectopic lamellipodia. Indeed, we found  
7 that expression of CHW-1(A18V) resulted in ectopic lamellipodia in 32% of PDE  
8 neurons (Figure 4). Expression of wild type CHW-1 or CHW-1(A18G) did not  
9 show ectopic lamellipodia. This suggests that like CDC42 and the Rac GTPases,  
10 CHW-1 may be involved in regulation of protrusion during neuronal development.  
11 Furthermore, these data suggest that full activation by a G12V mutation is  
12 necessary for this lamellipodial protrusion.

13

14 **Expression of CHW-1(A18G) results in amphid neuron defects.** The *osm-*  
15 *6::gfp* transgene is expressed in the PDE neurons as well as the sensory amphid  
16 neurons in the head and the phasmid neurons in the tail. When examining the  
17 PDE neurons in the CHW-1(A18G) mutant, we noticed that the morphology of  
18 the amphid neurons in the head was altered. The cell bodies of the amphid  
19 neurons in the CHW-1(A18G) transgenic animals were displaced anteriorly  
20 (Figure 5). Expression of wild-type CHW-1 or CHW-1(A18V) did not cause  
21 anterior amphid displacement. Interestingly, although the *osm-6::chw-1(A18G)*  
22 transgene displayed defects in amphid neuron morphology, the loss of function  
23 *chw-1(ok697)* allele did not display these defects. The *chw-1(ok697) crp-*



1 *1(ok685)* double mutant also so showed no amphid neuron defects (Figure 5).  
2 The endogenous amino acid at this regulatory position in CHW-1 is an alanine,  
3 which is predicted to be a partially activating mutation, suggesting that CHW-  
4 1(A18G) may be acting as a dominant-negative in this context.

5

6 ***chw-1(ok697)* in a *sax-3(ky123)* background increases amphid neuron**  
7 **defects.** We noted that amphid neuron phenotype of CHW-1(A18G) was similar  
8 to what was reported for a loss-of-function *sax-3* phenotype (Zallen et al. 1999).  
9 *sax-3* encodes an immunoglobulin guidance receptor similar to vertebrate and  
10 *Drosophila* Robo. We next investigated whether CHW-1 interacts genetically with  
11 SAX-3. First, we examined the amount of amphid neuron defects in the loss-of-  
12 function *sax-3(ky123)* animals. We found that 50% of the *sax-3(ky123)* animals  
13 had altered amphid neuron morphologies (Figure 6), similar to what was  
14 previously reported in the literature (Zallen et al. 1999). The *sax-3(ky123); chw-*  
15 *1(ok697)* double mutants displayed a synergistic increase in the amount of  
16 amphid neuron defects (Figure 6), suggesting redundant function. While the *sax-*  
17 *3(ky123)* allele is reported to be a null, these animals are viable (unlike other *sax-*  
18 *3* null alleles), suggesting that the *sax-3(ky123)* allele may retain a small amount  
19 of functionality. Thus, we cannot rule out that SAX-3 and CHW-1 might act in the  
20 same pathway. We did not observe any genetic interactions between *chw-1* and  
21 other axon guidance genes such as *unc-6* and *unc-40*.

22

1 **Loss of both *chw-1* and *sax-3* increases PDE axon pathfinding defects.**

2 Next, we sought to determine whether *chw-1* and *sax-3* interacted genetically in  
3 the context of PDE axon guidance. *chw-1(ok697)* and *sax-3(ky123)* alone  
4 resulted in PDE axon guidance defects (10% and 40%, respectively) (Figure 7).  
5 The double mutant (*chw-1(ok697); sax-3(ky123)*) displayed an increase in axon  
6 pathfinding defects (68%), suggesting that these genes act redundantly in axon  
7 pathfinding. We confirmed this result using RNAi against *sax-3*. Notably, *chw-1*  
8 showed no significant interactions with *unc-6* or *unc-40*, genes also involved in  
9 ventral PDE axon guidance.

10

11 **Loss of *chw-1* but not *crp-1* attenuates the effects of *myr::sax-3*.** Next, we

12 wanted to further define the relationship between CHW-1 and SAX-3. To do this,  
13 we constructed a transgene that expressed the cytoplasmic domain of SAX-3  
14 with an N-terminal myristoylation site. In UNC-40/DCC and UNC-5 receptors, a  
15 similar myristoylated construct leads to constitutive activation of these receptors  
16 (Gitai et al. 2003; Norris and Lundquist 2011; Norris et al. 2014). The MYR::SAX-  
17 3 transgene did not display a phenotype in the PDE neurons or in the amphid  
18 neurons when driven from the *osm-6* promoter. Therefore, we expressed  
19 *myr::sax-3* in the VD/DD motor neurons using the *unc-25* promoter. The VD/DD  
20 motor neurons are born in the ventral nerve cord and have axons that extend to  
21 the dorsal nerve cord. Dorsal guidance of these commissures is not dependent  
22 upon endogenous SAX-3 (Li et al. 2013), however activation of SAX-3 in the  
23 neurons significantly alters dorsal axon guidance. We observed that MYR::SAX-3

1 caused axon pathfinding defects in the majority of VD/DD motor neurons (98%)  
2 (Figure 8). Loss of *chw-1* significantly attenuated these guidance defects (68%),  
3 whereas loss of *crp-1* did not. These results were confirmed using RNAi, where  
4 loss of *chw-1* by RNAi also decreased the axon pathfinding defects in the  
5 MYR::SAX-3 background (79%) These data suggest that CHW-1 acts with SAX-  
6 3 in axon guidance in the VD/DD motor neurons.

7

8

## DISCUSSION

9 There have been several studies focused on molecules that function in axon  
10 guidance. However, the entire picture of how these molecules function together  
11 in concert is still unclear. CDC-42 and other Rho GTPases, such as CED-10 and  
12 MIG-2, have been previously characterized in axon guidance (Gallo and  
13 Letourneau 1998; Hall and Lalli ; Luo 2000). However, there have been no  
14 studies describing if and how the other *C. elegans* CDC-42 family members,  
15 CHW-1 and CRP-1 contribute to axon guidance. Here, we present evidence  
16 suggesting that *chw-1* works redundantly with *crp-1* and *cdc-42* in axon  
17 guidance. Furthermore, overexpression of either CHW-1 or CHW-1 GTPase  
18 mutants alters axon guidance, suggesting that like the human counterpart Wrch-  
19 1, proper levels of CHW-1 expression and activity are required for normal CHW-1  
20 function. For example, in cell culture either knockdown, overexpression or  
21 alterations in the GTPase activity of Wrch-1 results in similar disruptions in  
22 epithelial cell morphogenesis (Alan et al. ; Brady et al. 2009). Taken together,

1 these data suggest that tightly regulated expression and activity levels of CHW-1  
2 and Wrch-1 are required for their normal biological functions.

3

4 Next, we showed that a GTPase deficient (activated) mutant of CHW-1, CHW-  
5 1(A18V), results in the formation of ectopic lamellipodia in the PDE neuron. This  
6 result is similar to the phenotype observed for activated versions of MIG-2, CED-  
7 10, and CDC-42 (Struckhoff and Lundquist 2003) (Demarco and Lundquist),  
8 suggesting that, like these canonical GTPases, CHW-1 regulates the actin  
9 cytoskeleton. There is evidence that, similar to CDC-42, Wrch-1 also regulates  
10 the actin cytoskeleton and is able to regulate the formation of filopodia in cells  
11 (Aspenstrom et al. 2004; Ruusala and Aspenstrom 2008). Regulation of the actin  
12 cytoskeleton is critical for many biological and pathological events, including  
13 normal cell migration and metastasis. Indeed, Wrch-1 and Chp-1 have been  
14 shown to be important in focal adhesion turnover (Ory et al. 2007; Chuang et al.  
15 2007; Aspenstrom et al. 2004), neural crest cell migration (Faure and Fort 2011;  
16 Notarnicola et al. 2008), and T-ALL cell migration (Bhavsar et al. 2013). Further  
17 studies should be aimed at examining the specific signaling pathways involved in  
18 CHW-1 axon guidance and neuronal migration.

19

20 To visualize the PDE neuron we utilized the *osm-6* promoter, which also allows  
21 visualization of the amphid neurons in the head and the phasmid neurons in the  
22 tail (Collet et al. 1998). When we visualized the PDE neuron, we observed that  
23 one of the GTPase mutants, CHW-1(A18G), resulted in altered amphid neuron

1 morphology. The amphid neurons are born in the nose, and they migrate  
2 anteriorly to their final position where the bodies are located in the anterior region  
3 of the pharyngeal bulb and the axons that associate with the nerve ring. We  
4 noticed that the amphid neuron cell bodies in the CHW-1(A18G) animals were  
5 displaced anteriorly, similar to a loss of functions SAX-3 mutant (Zallen et al.  
6 1999). In most Ras superfamily GTPases, the glycine at position 12 in Ras  
7 (position 18 in CHW-1) is highly conserved. Any other amino acid at this position  
8 is predicted to hinder the GTPase ability of the protein, rendering the protein at  
9 least partially activated. A valine at this position is the strongest activating  
10 mutation, resulting in a protein that has no GTPase activity (Wittinghofer et al.  
11 1991) and is insensitive to GAPs, rendering the protein constitutively GTP-bound  
12 and active (Ahmadian et al. 1997). Normally, CHW-1 has an alanine at this  
13 position (position 18), which is predicted to be partially activating. Therefore,  
14 mutation of this alanine to a valine is predicated to be a stronger activation  
15 mutation, and mutation to a glycine would be predicted to decrease the activity of  
16 this protein. Indeed, when this alanine is mutated to a valine, it results in ectopic  
17 lamellipodia formation in the PDE neuron, similar to what is observed in CDC-42,  
18 CED-10, and MIG-2 (Shakir et al. 2008; Struckhoff and Lundquist 2003; Demarco  
19 and Lundquist). Furthermore, expression of the glycine mutant (CHW-1(A18G))  
20 results in altered amphid neuron morphology, suggesting that CHW-1 activity is  
21 required for proper amphid neuron morphology and migration. CHW-1(A18G)  
22 may result in decreased function of the protein (by increased GTPase activity),  
23 but it also may act as a dominant negative. To further explore the role of CHW-

1 1(A18G), we examined a null allele of *chw-1*. The null allele did not result in any  
2 defects in the amphid neurons, suggesting that CHW-1(A18G) is not acting  
3 simply as a protein with decreased function, and may be acting as a dominant  
4 negative. Further biochemical studies are needed to confirm this hypothesis.

5

6 This is the second study that examines GTPase mutants of CHW-1. In a paper  
7 by Kidd *et al.*, the authors showed that expression of wild-type CHW-1 resulted in  
8 errant distal tip cell (DTC) migration when compared to the GFP only negative  
9 control (Kidd *et al.* 2015). The authors also found that expression of CHW-  
10 1(A18G) abolished these defects, and expression of an activated CHW-1(A18V)  
11 mutant increased these defects, suggesting that native CHW-1 is partially  
12 activated. In our hands, ectopic expression of CHW-1 in the PDE neurons  
13 caused axon pathfinding defects, and neither GTPase mutant statistically altered  
14 the amount of defects, suggesting that in this system increased CHW-1  
15 expression in this system is sufficient to induce axon guidance defects. We also  
16 found that activated CHW-1(A18V) induced ectopic lamellipodia in the PDE  
17 neurons, similar to the activated versions of other Rho proteins, supporting the  
18 findings of Kidd *et al.* In addition, we found the CHW-1(A18G) mutant may be a  
19 dominant negative mutation, complementing the previous findings.

20

21 With the CHW-1(A18G) mutant, we found that the amphid neurons were  
22 displaced anteriorly, similar to a *sax-3* loss of function phenotype. Therefore, we  
23 wanted to determine if *chw-1* interacted with *sax-3* in neuronal guidance. We

1 found that *chw-1* interacts genetically with *sax-3* in amphid neurons, and in the  
2 PDE neurons. We found that loss of *chw-1* and *sax-3* synergistically increased  
3 the defects in amphid neurons and PDE axon pathfinding. These data suggest  
4 that these genes may be working in the same or redundant pathways. To further  
5 explore the relationship between *chw-1* and *sax-3*, we added an myristoylation  
6 site to *sax-3*, which results in an activated version of *sax-3* (*unc-25::myr-sax-3*).  
7 This modification has been previously used for other guidance receptors, such as  
8 UNC-40 (Gitai et al. 2003), to generate constitutively active receptors.  
9 Expression of MYR-SAX-3 in the VD/DD motor neurons resulted in axon  
10 pathfinding defects. These pathfinding defects were attenuated when we crossed  
11 in a null *chw-1* allele. These defects were not attenuated in the presence of a null  
12 *crp-1* allele. These data suggest that *chw-1* but not *crp-1* are working  
13 downstream of *sax-3* in axon pathfinding. These data were confirmed with RNAi,  
14 which showed that RNAi against *chw-1* but not *crp-1* decreased the axon  
15 guidance defects driven by activated SAX-3.

16

17 The *C. elegans* SAX-3/Robo is a guidance receptor, which acts in anterior–  
18 posterior, dorsal–ventral, and midline guidance decisions (Killeen and Sybingco  
19 2008). Binding of the ligand Slit to the SAX-3/Robo receptor deactivates Cdc42  
20 and activates another Rho GTPase, RhoA (Wong et al. 2001). In *Drosophila*, the  
21 adaptor protein Dock directly binds Robo and recruits p-21 activated kinase (Pak)  
22 and Sos, thus increasing Rac activity (Fan et al. 2003). Here, we show that there  
23 is a genetic interaction between *sax-3* and *chw-1*, and that *chw-1* is likely working

1 downstream of *sax-3* in the VD/DD motor neurons. Activation of SAX-3 likely also  
2 results in signaling through CHW-1, in addition to other Rho GTPases, to  
3 mediate axon guidance. SAX-3/Robo signaling has also been implicated in  
4 carcinogenesis. Slit2 expression occurs in a large number of solid tumors, and  
5 Robo1 expression occurs in parallel in vascular endothelial cells. Concurrent  
6 expression of these proteins results in angiogenesis and increased tumor mass  
7 (Wang et al. 2003). Furthermore, mutations in SLT2, ROBO1, and ROBO2 are  
8 implicated in pancreatic ductal adenocarcinoma (Biankin et al. 2012). Although the  
9 mammalian homologues Wrch-1 and Chp have been implicated in epithelial cell  
10 morphogenesis (Brady et al. 2009; Alan et al.), migration (Ory et al. 2007;  
11 Chuang et al. 2007; Faure and Fort 2011), and anchorage-independent growth  
12 (Berzat et al. 2005; Alan et al. ; Chenette et al. 2006), the exact mechanisms by  
13 which these processes occur remains to be fully elucidated. One possible  
14 mechanism may be SAX-3/Robo signaling through CHW-1/Wrch-1. Further  
15 studies will be aimed at determining the precise mechanism by which these two  
16 molecules interact in both normal physiological processes and aberrant  
17 pathological processes.

18

19 In summary, we have shown that *chw-1* works redundantly with *crp-1* and *cdc-42*  
20 in axon guidance. Furthermore, proper levels and activity of CHW-1 are required  
21 for proper axon guidance in *C. elegans*. Importantly, we were able to show that  
22 CHW-1 is working downstream of the guidance receptor SAX-3/Robo. This novel  
23 pathway is important in axon guidance and may be important in development in



1 addition to other pathogenic processes such as tumorigenesis, angiogenesis,  
2 and metastasis.

3

4

5

6

7

## FIGURE LEGENDS

8

9 **Figure 1. CHW-1 is similar to Wrch-1/RhoU and Chp/Wrch-2/RhoV.**

10 Sequence alignment of CHW-1, human Wrch-1, and human Chp done in biology  
11 workbench. Identical residues are marked with an asterisk (\*). B) CHW-1 lacks  
12 the N-terminal extension found in Wrch-1 and Chp (light gray box). CHW-1 also  
13 contains an atypical residue (alanine instead of glycine) at position 18 (analogous  
14 to position 12 in Cdc42 and most Rho and Ras family members).

15

16 **Figure 2. *chw-1* works redundantly with *cdc-42* and *crp-1* in axon guidance.**

17 Quantitation of PDE defects. *lqls2* is the *osm-6::gfp* control transgene. At least  
18 100 neurons were scored for each genotype.  $p < 0.0001$  as determined by Fisher  
19 Exact Analysis (Graphpad). The error bars represent the standard proportion of  
20 the mean.

21

22 **Figure 3. Proper expression and activity levels of CHW-1 are required for**

23 **axon guidance.** A) Quantitation of PDE defects. *lqls2* is the *osm-6::gfp* control

1 transgene. At least 100 neurons were scored for each genotype.  $p < 0.0001$  as  
2 determined by Fisher Exact Analysis (Graphpad). The error bars represent the  
3 standard proportion of the mean. B) A micrograph of a PDE neuron of a WT adult  
4 animal (left panel) and a PDE neuron of an adult animal expressing CHW-  
5 1(A18G) (right panel). The scale bar represents 5  $\mu\text{m}$ .

6

7 **Figure 4. Expression of CHW-1(A18V) results in the formation of ectopic**  
8 **lamellipodia in PDE neurons.** A) Quantitation of PDE defects. *osm-6::gfp* is the  
9 control transgene. At least 100 neurons were scored for each genotype.  
10  $p < 0.0001$  as determined by Fisher Exact Analysis (Graphpad). The error bars  
11 represent the standard proportion of the mean. B) A micrograph of a PDE neuron  
12 of a WT adult animal (left panel) and a PDE neuron of an adult animal expressing  
13 CHW-1(A18V) (right panel).

14

15 **Figure 5. Expression of CHW-1(A18G) results in amphid neuron defects.** A)  
16 Quantitation of amphid neuron defects. *lqls2* is the *osm-6::gfp* control transgene..  
17 The Y-axis denotes the genotype and the X-axis represents the percentage of  
18 amphid neuron defects. At least 100 neurons were scored for each genotype.  
19  $p < 0.0001$  as determined by Fisher Exact Analysis (Graphpad). The error bars  
20 represent the standard proportion of the mean. B) A micrograph of the amphid  
21 neurons of a WT adult animal (left panel), and the amphid neurons of adult  
22 animals expressing CHW-1(A18G) (right two panels). The wild-type position of

1 the amphid neuron cell bodies is indicated by the white arrow and the mutant  
2 positions are indicated by the yellow arrows.

3

4 **Figure 6. Loss of both *chw-1* and *sax-3*, but not other axon guidance**  
5 **molecules, synergistically increases amphid neuron defects.** Quantitation of  
6 amphid neuron defects. *lqls2* is the *osm-6::gfp* control transgene.. The Y-axis  
7 denotes the genotype and the X-axis represents the percentage of amphid  
8 neuron defects. At least 100 neurons were scored for each genotype.  $p < 0.0001$   
9 as determined by Fisher Exact Analysis (Graphpad). The error bars represent the  
10 standard proportion of the mean.

11

12 **Figure 7. Loss of both *chw-1* and *sax-3* increases PDE axon pathfinding**  
13 **defects.** Quantitation of PDE defects. *lqls2* is the *osm-6::gfp* control transgene.  
14 The Y-axis denotes the genotype and the X-axis represents the percentage of  
15 ectopic lamellipodia formation. At least 100 neurons were scored for each  
16 genotype.  $*p < 0.0001$  as determined by Fisher Exact Analysis. The error bars  
17 represent the standard proportion of the mean.

18

19 **Figure 8. Loss of *chw-1* but not *crp-1* attenuates the defects in the VD/DD**  
20 **motor neurons driven by activated SAX-3.** A) A representation of the MYR-  
21 SAX-3 construct. B) A micrograph of the VD/DD neurons of a WT adult animal  
22 (top panel), and the VD/DD neurons of an adult animal expressing MYR-SAX-3  
23 (bottom panel). C) Quantitation of VD/DD defects. *unc-25::myr-sax-3* is the

1 activated SAX-3 receptor driven by the *unc-25* promoter, which drives  
2 expression in the VD/DD motor neurons. The Y-axis denotes the genotype and  
3 the X-axis represents the percentage of ectopic lamellipodia formation. The  
4 number of axons scored was greater than 100. \* $p < 0.0004$  as determined by  
5 Fisher Exact Analysis. The error bars represent the standard proportion of the  
6 mean.

7

8

## 9 REFERENCES

- 10 **Ahmadian, M.R., U. Hoffmann, R.S. Goody, and A. Wittinghofer, 1997 Individual**  
11 **rate constants for the interaction of Ras proteins with GTPase-**  
12 **activating proteins determined by fluorescence spectroscopy.**  
13 ***Biochemistry* 36 (15):4535-4541.**
- 14 **Alan, J.K., A.C. Berzat, B.J. Dewar, L.M. Graves, and A.D. Cox, Regulation of the**  
15 **Rho family small GTPase Wrch-1/RhoU by C-terminal tyrosine**  
16 **phosphorylation requires Src. *Mol Cell Biol* 30 (17):4324-4338.**
- 17 **Aronheim, A., Y.C. Broder, A. Cohen, A. Fritsch, B. Belisle *et al.*, 1998 Chp, a**  
18 **homologue of the GTPase Cdc42Hs, activates the JNK pathway and is**  
19 **implicated in reorganizing the actin cytoskeleton. *Curr Biol* 8**  
20 **(20):1125-1128.**
- 21 **Aspenstrom, P., A. Fransson, and J. Saras, 2004 Rho GTPases have diverse**  
22 **effects on the organization of the actin filament system. *Biochem J* 377**  
23 **(Pt 2):327-337.**

- 1 **Berzat, A.C., J.E. Buss, E.J. Chenette, C.A. Weinbaum, A. Shutes *et al.*, 2005**  
2 **Transforming activity of the Rho family GTPase, Wrch-1, a Wnt-**  
3 **regulated Cdc42 homolog, is dependent on a novel carboxyl-terminal**  
4 **palmitoylation motif. *J Biol Chem* 280 (38):33055-33065.**
- 5 **Bhavsar, P.J., E. Infante, A. Khwaja, and A.J. Ridley, 2013 Analysis of Rho**  
6 **GTPase expression in T-ALL identifies RhoU as a target for Notch**  
7 **involved in T-ALL cell migration. *Oncogene* 32 (2):198-208.**
- 8 **Biankin, A.V., N. Waddell, K.S. Kassahn, M.C. Gingras, L.B. Muthuswamy *et al.*,**  
9 **2012 Pancreatic cancer genomes reveal aberrations in axon guidance**  
10 **pathway genes. *Nature* 491 (7424):399-405.**
- 11 **Brady, D.C., J.K. Alan, J.P. Madigan, A.S. Fanning, and A.D. Cox, 2009 The**  
12 **transforming Rho family GTPase Wrch-1 disrupts epithelial cell tight**  
13 **junctions and epithelial morphogenesis. *Mol Cell Biol* 29 (4):1035-1049.**
- 14 **Brazier, H., G. Pawlak, V. Vives, and A. Blangy, 2009 The Rho GTPase Wrch1**  
15 **regulates osteoclast precursor adhesion and migration. *Int J Biochem***  
16 ***Cell Biol* 41 (6):1391-1401.**
- 17 **Brazier, H., S. Stephens, S. Ory, P. Fort, N. Morrison *et al.*, 2006 Expression**  
18 **profile of RhoGTPases and RhoGEFs during RANKL-stimulated**  
19 **osteoclastogenesis: identification of essential genes in osteoclasts. *J***  
20 ***Bone Miner Res* 21 (9):1387-1398.**
- 21 **Brenner, S., 1974 The genetics of *Caenorhabditis elegans*. *Genetics* 77 (1):71-**  
22 **94.**

- 1 **Caruso, M.E., S. Jenna, M. Bouchecareilh, D.L. Baillie, D. Boismenu *et al.*, 2008**  
2 **GTPase-mediated regulation of the unfolded protein response in**  
3 **Caenorhabditis elegans is dependent on the AAA+ ATPase CDC-48. *Mol***  
4 ***Cell Biol* 28 (13):4261-4274.**
- 5 **Chenette, E.J., A. Abo, and C.J. Der, 2005 Critical and distinct roles of amino-**  
6 **and carboxyl-terminal sequences in regulation of the biological activity**  
7 **of the Chp atypical Rho GTPase. *J Biol Chem* 280 (14):13784-13792.**
- 8 **Chenette, E.J., N.Y. Mitin, and C.J. Der, 2006 Multiple sequence elements**  
9 **facilitate Chp Rho GTPase subcellular location, membrane association,**  
10 **and transforming activity. *Mol Biol Cell* 17 (7):3108-3121.**
- 11 **Chuang, Y.Y., A. Valster, S.J. Coniglio, J.M. Backer, and M. Symons, 2007 The**  
12 **atypical Rho family GTPase Wrch-1 regulates focal adhesion formation**  
13 **and cell migration. *J Cell Sci* 120 (Pt 11):1927-1934.**
- 14 **Collet, J., C.A. Spike, E.A. Lundquist, J.E. Shaw, and R.K. Herman, 1998 Analysis**  
15 **of *osm-6*, a gene that affects sensory cilium structure and sensory**  
16 **neuron function in *Caenorhabditis elegans*. *Genetics* 148 (1):187-200.**
- 17 **de Toledo, M., F. Senic-Matuglia, J. Salamero, G. Uze, F. Comunale *et al.*, 2003**  
18 **The GTP/GDP cycling of rho GTPase TCL is an essential regulator of the**  
19 **early endocytic pathway. *Mol Biol Cell* 14 (12):4846-4856.**
- 20 **Demarco, R.S., and E.A. Lundquist, RACK-1 Acts with Rac GTPase Signaling and**  
21 **UNC-115/abLIM in *Caenorhabditis elegans* Axon Pathfinding and Cell**  
22 **Migration. *PLoS Genet* 6 (11):e1001215.**

- 1 **Dickson, B.J., 2001 Rho GTPases in growth cone guidance. *Curr Opin Neurobiol***  
2 **11 (1):103-110.**
- 3 **Dickson, B.J., 2002 Molecular mechanisms of axon guidance. *Science* 298**  
4 **(5600):1959-1964.**
- 5 **Etienne-Manneville, S., and A. Hall, 2002 Rho GTPases in cell biology. *Nature***  
6 **420 (6916):629-635.**
- 7 **Fan, X., J.P. Labrador, H. Hing, and G.J. Bashaw, 2003 Slit stimulation recruits**  
8 **Dock and Pak to the roundabout receptor and increases Rac activity to**  
9 **regulate axon repulsion at the CNS midline. *Neuron* 40 (1):113-127.**
- 10 **Faure, S., and P. Fort, 2011 Atypical RhoV and RhoU GTPases control**  
11 **development of the neural crest. *Small GTPases* 2 (6):310-313.**
- 12 **Gallo, G., and P. Letourneau, 2002 Axon guidance: proteins turnover in turning**  
13 **growth cones. *Curr Biol* 12 (16):R560-562.**
- 14 **Gallo, G., and P.C. Letourneau, 1998 Axon guidance: GTPases help axons reach**  
15 **their targets. *Curr Biol* 8 (3):R80-82.**
- 16 **Gitai, Z., T.W. Yu, E.A. Lundquist, M. Tessier-Lavigne, and C.I. Bargmann, 2003**  
17 **The netrin receptor UNC-40/DCC stimulates axon attraction and**  
18 **outgrowth through enabled and, in parallel, Rac and UNC-115/AbLIM.**  
19 ***Neuron* 37 (1):53-65.**
- 20 **Guemar, L., P. de Santa Barbara, E. Vignal, B. Maurel, P. Fort *et al.*, 2007 The**  
21 **small GTPase RhoV is an essential regulator of neural crest induction in**  
22 ***Xenopus*. *Dev Biol* 310 (1):113-128.**

- 1 Hall, A., and G. Lalli, Rho and Ras GTPases in axon growth, guidance, and  
2 branching. *Cold Spring Harb Perspect Biol* 2 (2):a001818.
- 3 J, S., and H. J, 1988 *The nematode Caenorhabditis elegans*. Cold Spring Harbor,  
4 NY: Cold Spring Harbor Laboratory Press.
- 5 Jaffe, A.B., and A. Hall, 2005 Rho GTPases: biochemistry and biology. *Annu Rev*  
6 *Cell Dev Biol* 21:247-269.
- 7 Jenna, S., M.E. Caruso, A. Emadali, D.T. Nguyen, M. Dominguez *et al.*, 2005  
8 Regulation of membrane trafficking by a novel Cdc42-related protein in  
9 *Caenorhabditis elegans* epithelial cells. *Mol Biol Cell* 16 (4):1629-1639.
- 10 Jin, Y., E. Jorgensen, E. Hartwig, and H.R. Horvitz, 1999 The *Caenorhabditis*  
11 *elegans* gene *unc-25* encodes glutamic acid decarboxylase and is  
12 required for synaptic transmission but not synaptic development. *J*  
13 *Neurosci* 19 (2):539-548.
- 14 Kamath, R.S., and J. Ahringer, 2003 Genome-wide RNAi screening in  
15 *Caenorhabditis elegans*. *Methods* 30 (4):313-321.
- 16 Kidd, A.R., 3rd, V. Muniz-Medina, C.J. Der, A.D. Cox, and D.J. Reiner, 2015 The C.  
17 *elegans* Chp/Wrch Ortholog CHW-1 Contributes to LIN-18/Ryk and LIN-  
18 17/Frizzled Signaling in Cell Polarity. *PLoS One* 10 (7):e0133226.
- 19 Killeen, M.T., and S.S. Sybingco, 2008 Netrin, Slit and Wnt receptors allow  
20 axons to choose the axis of migration. *Dev Biol* 323 (2):143-151.
- 21 Li, J., P. Pu, and W. Le, 2013 The SAX-3 receptor stimulates axon outgrowth and  
22 the signal sequence and transmembrane domain are critical for SAX-3



- 1            **membrane localization in the PDE neuron of *C. elegans*. *PLoS One* 8**  
2            **(6):e65658.**
- 3            **Lundquist, E.A., 2003 Rac proteins and the control of axon development. *Curr***  
4            ***Opin Neurobiol* 13 (3):384-390.**
- 5            **Luo, L., 2000 Rho GTPases in neuronal morphogenesis. *Nat Rev Neurosci* 1**  
6            **(3):173-180.**
- 7            **Mello, C., and A. Fire, 1995 DNA transformation. *Methods Cell Biol* 48:451-482.**
- 8            **Michaelson, D., J. Silletti, G. Murphy, P. D'Eustachio, M. Rush *et al.*, 2001**  
9            **Differential localization of Rho GTPases in live cells: regulation by**  
10           **hypervariable regions and RhoGDI binding. *J Cell Biol* 152 (1):111-126.**
- 11           **Murphy, G.A., S.A. Jillian, D. Michaelson, M.R. Philips, P. D'Eustachio *et al.*, 2001**  
12           **Signaling mediated by the closely related mammalian Rho family**  
13           **GTPases TC10 and Cdc42 suggests distinct functional pathways. *Cell***  
14           ***Growth Differ* 12 (3):157-167.**
- 15           **Murphy, G.A., P.A. Solski, S.A. Jillian, P. Perez de la Ossa, P. D'Eustachio *et al.*,**  
16           **1999 Cellular functions of TC10, a Rho family GTPase: regulation of**  
17           **morphology, signal transduction and cell growth. *Oncogene* 18**  
18           **(26):3831-3845.**
- 19           **Norris, A.D., and E.A. Lundquist, 2011 UNC-6/netrin and its receptors UNC-5**  
20           **and UNC-40/DCC modulate growth cone protrusion in vivo in *C. elegans*.**  
21           ***Development* 138 (20):4433-4442.**
- 22           **Norris, A.D., L. Sundararajan, D.E. Morgan, Z.J. Roberts, and E.A. Lundquist,**  
23           **2014 The UNC-6/Netrin receptors UNC-40/DCC and UNC-5 inhibit**

- 1           **growth cone filopodial protrusion via UNC-73/Trio, Rac-like GTPases**  
2           **and UNC-33/CRMP. *Development* 141 (22):4395-4405.**
- 3   **Notarnicola, C., L. Le Guen, P. Fort, S. Faure, and P. de Santa Barbara, 2008**  
4           **Dynamic expression patterns of RhoV/Chp and RhoU/Wrch during**  
5           **chicken embryonic development. *Dev Dyn* 237 (4):1165-1171.**
- 6   **Okada, S., E. Yamada, T. Saito, K. Ohshima, K. Hashimoto *et al.*, 2008 CDK5-**  
7           **dependent phosphorylation of the Rho family GTPase TC10(alpha)**  
8           **regulates insulin-stimulated GLUT4 translocation. *J Biol Chem* 283**  
9           **(51):35455-35463.**
- 10   **Ory, S., H. Brazier, and A. Blangy, 2007 Identification of a bipartite focal**  
11           **adhesion localization signal in RhoU/Wrch-1, a Rho family GTPase that**  
12           **regulates cell adhesion and migration. *Biol Cell* 99 (12):701-716.**
- 13   **Ridley, A.J., 2004 Rho proteins and cancer. *Breast Cancer Res Treat* 84 (1):13-**  
14           **19.**
- 15   **Ruusala, A., and P. Aspenstrom, 2008 The atypical Rho GTPase Wrch1**  
16           **collaborates with the nonreceptor tyrosine kinases Pyk2 and Src in**  
17           **regulating cytoskeletal dynamics. *Mol Cell Biol* 28 (5):1802-1814.**
- 18   **Sambrook J., F.E.F.a.M., 1989 *Molecular Cloning: A Laboratory Manuel*. Cold**  
19           **Spring Harbor, NY: Cold Spring Harbor Laboratory Press**  
20           **.**
- 21   **Saras, J., P. Wollberg, and P. Aspenstrom, 2004 Wrch1 is a GTPase-deficient**  
22           **Cdc42-like protein with unusual binding characteristics and cellular**  
23           **effects. *Exp Cell Res* 299 (2):356-369.**

- 1 **Shakir, M.A., K. Jiang, E.C. Struckhoff, R.S. Demarco, F.B. Patel *et al.*, 2008 The**  
2 **Arp2/3 activators WAVE and WASP have distinct genetic interactions**  
3 **with Rac GTPases in *Caenorhabditis elegans* axon guidance. *Genetics***  
4 **179 (4):1957-1971.**
- 5 **Shepelev, M.V., J. Chernoff, and I.V. Korobko, 2011 Rho family GTPase**  
6 **Chp/RhoV induces PC12 apoptotic cell death via JNK activation. *Small***  
7 ***GTPases* 2 (1):17-26.**
- 8 **Shepelev, M.V., and I.V. Korobko, 2012 Pak6 protein kinase is a novel effector**  
9 **of an atypical Rho family GTPase Chp/RhoV. *Biochemistry (Mosc)* 77**  
10 **(1):26-32.**
- 11 **Shutes, A., A.C. Berzat, E.J. Chenette, A.D. Cox, and C.J. Der, 2006 Biochemical**  
12 **analyses of the Wrch atypical Rho family GTPases. *Methods Enzymol***  
13 **406:11-26.**
- 14 **Shutes, A., A.C. Berzat, A.D. Cox, and C.J. Der, 2004 Atypical mechanism of**  
15 **regulation of the Wrch-1 Rho family small GTPase. *Curr Biol* 14**  
16 **(22):2052-2056.**
- 17 **Struckhoff, E.C., and E.A. Lundquist, 2003 The actin-binding protein UNC-115 is**  
18 **an effector of Rac signaling during axon pathfinding in *C. elegans*.**  
19 ***Development* 130 (4):693-704.**
- 20 **Tao, W., D. Pennica, L. Xu, R.F. Kalejta, and A.J. Levine, 2001 Wrch-1, a novel**  
21 **member of the Rho gene family that is regulated by Wnt-1. *Genes Dev* 15**  
22 **(14):1796-1807.**

- 1    **Tessier-Lavigne, M., and C.S. Goodman, 1996 The molecular biology of axon**  
2            **guidance. *Science* 274 (5290):1123-1133.**
- 3    **Vignal, E., M. De Toledo, F. Comunale, A. Ladopoulou, C. Gauthier-Rouviere *et***  
4            ***al.*, 2000 Characterization of TCL, a new GTPase of the rho family**  
5            **related to TC10 and Cdc42. *J Biol Chem* 275 (46):36457-36464.**
- 6    **Wang, B., Y. Xiao, B.B. Ding, N. Zhang, X. Yuan *et al.*, 2003 Induction of tumor**  
7            **angiogenesis by Slit-Robo signaling and inhibition of cancer growth by**  
8            **blocking Robo activity. *Cancer Cell* 4 (1):19-29.**
- 9    **Wittinghofer, F., U. Krengel, J. John, W. Kabsch, and E.F. Pai, 1991 Three-**  
10           **dimensional structure of p21 in the active conformation and analysis of**  
11           **an oncogenic mutant. *Environ Health Perspect* 93:11-15.**
- 12   **Wong, K., X.R. Ren, Y.Z. Huang, Y. Xie, G. Liu *et al.*, 2001 Signal transduction in**  
13           **neuronal migration: roles of GTPase activating proteins and the small**  
14           **GTPase Cdc42 in the Slit-Robo pathway. *Cell* 107 (2):209-221.**
- 15   **Zallen, J.A., S.A. Kirch, and C.I. Bargmann, 1999 Genes required for axon**  
16           **pathfinding and extension in the *C. elegans* nerve ring. *Development* 126**  
17           **(16):3679-3692.**
- 18   **Zhang, J.S., A. Koenig, C. Young, and D.D. Billadeau, GRB2 couples RhoU to**  
19           **epidermal growth factor receptor signaling and cell migration. *Mol Biol***  
20           ***Cell* 22 (12):2119-2130.**
- 21
- 22

# A

```

Wrch-1      MPPQOGDPAFPDRCEAPPVPPRRERGGRRGPGEPGGRGRAGGAEGRGVKCVLVGDGAV
Chp         MPPRELSEAEPPPLRAPTPPPRRRS-----APPEL-----GIKCVLVGDGAV
CHW-1      MAKEEDEKC -----LKCIFVGNAAV
            *                               *  **  **

Wrch-1      GKTSLVVSYTTNGYPTEYIPTAFDNFSAVVSVDGRPVRLQLCDTAGQDEFDKLRPLCYTN
Chp         GKSSLIVSYTCNGYPARYRPTALDTFSVQVLVDGAPVRIELWDTAGQEDFDRLRSLCYPD
CHW-1      GKTSMIVSYTTNVYPHNYVPTAFDNFSVVVLVDKKPIRLQLHDTAGQSSFDTLRPLCYTD
            **      **** * ** * **** * * * ** * * ***** ** ** **

Wrch-1      TDIFLLCFSVVSPPSSFQNVSEKWVPEIRCHCPKAPIILVGTQSDLREDVKVLIELDKC-K
Chp         TDVFLACFSVVQPSSFQNI TEKWLP EIRTHNPQAPVLLVGTQADLRDDVNVLIQLDQGGR
CHW-1      ADVFVIVYSVVDLQSFEDVSHHWYPEVTKRNPGTKLILVGTQADQRWQV-----R
            * *      ***  **      * **      ***** * *

Wrch-1      EKPVP EEA AKLCAEEI KAASYIECSALTQKNLKEVFDAAI VAGIQYSDTQQOPKKSRSRT
Chp         EGPVPQPQAQGLAEKIRACCYLECSALTQKNLKEVFDSAILS AIEHKARLEKKNLAKG--
CHW-1      GNTVTQLRGKALADRLG-AEFFECSALTQHNLKQMFDAAILAGLEGKKNREKRSNFYTKS
            *      *      ***** ** ** **

Wrch-1      PDKMKNLSKSWWKYCCFV
Chp         ---VRTLSRCRWKKFFCFV
CHW-1      S-KIKERVARFITRTRNLI
    
```

# B

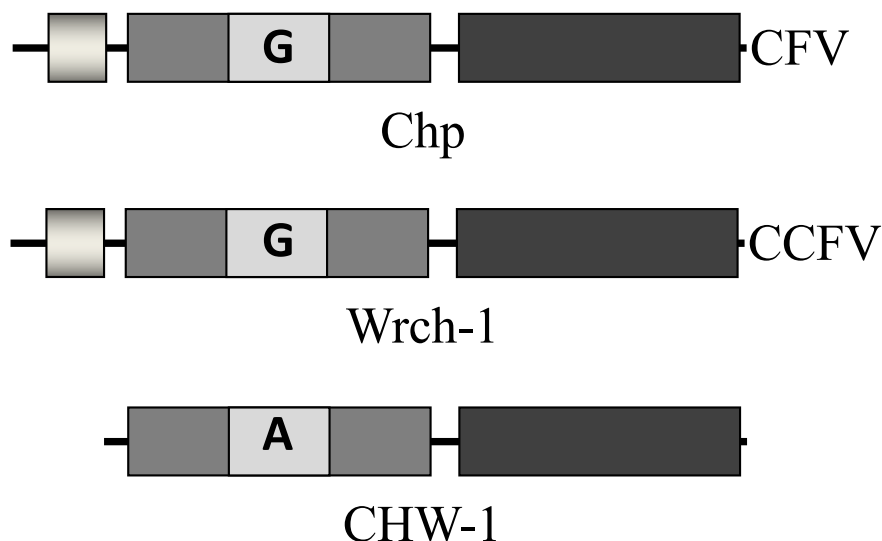

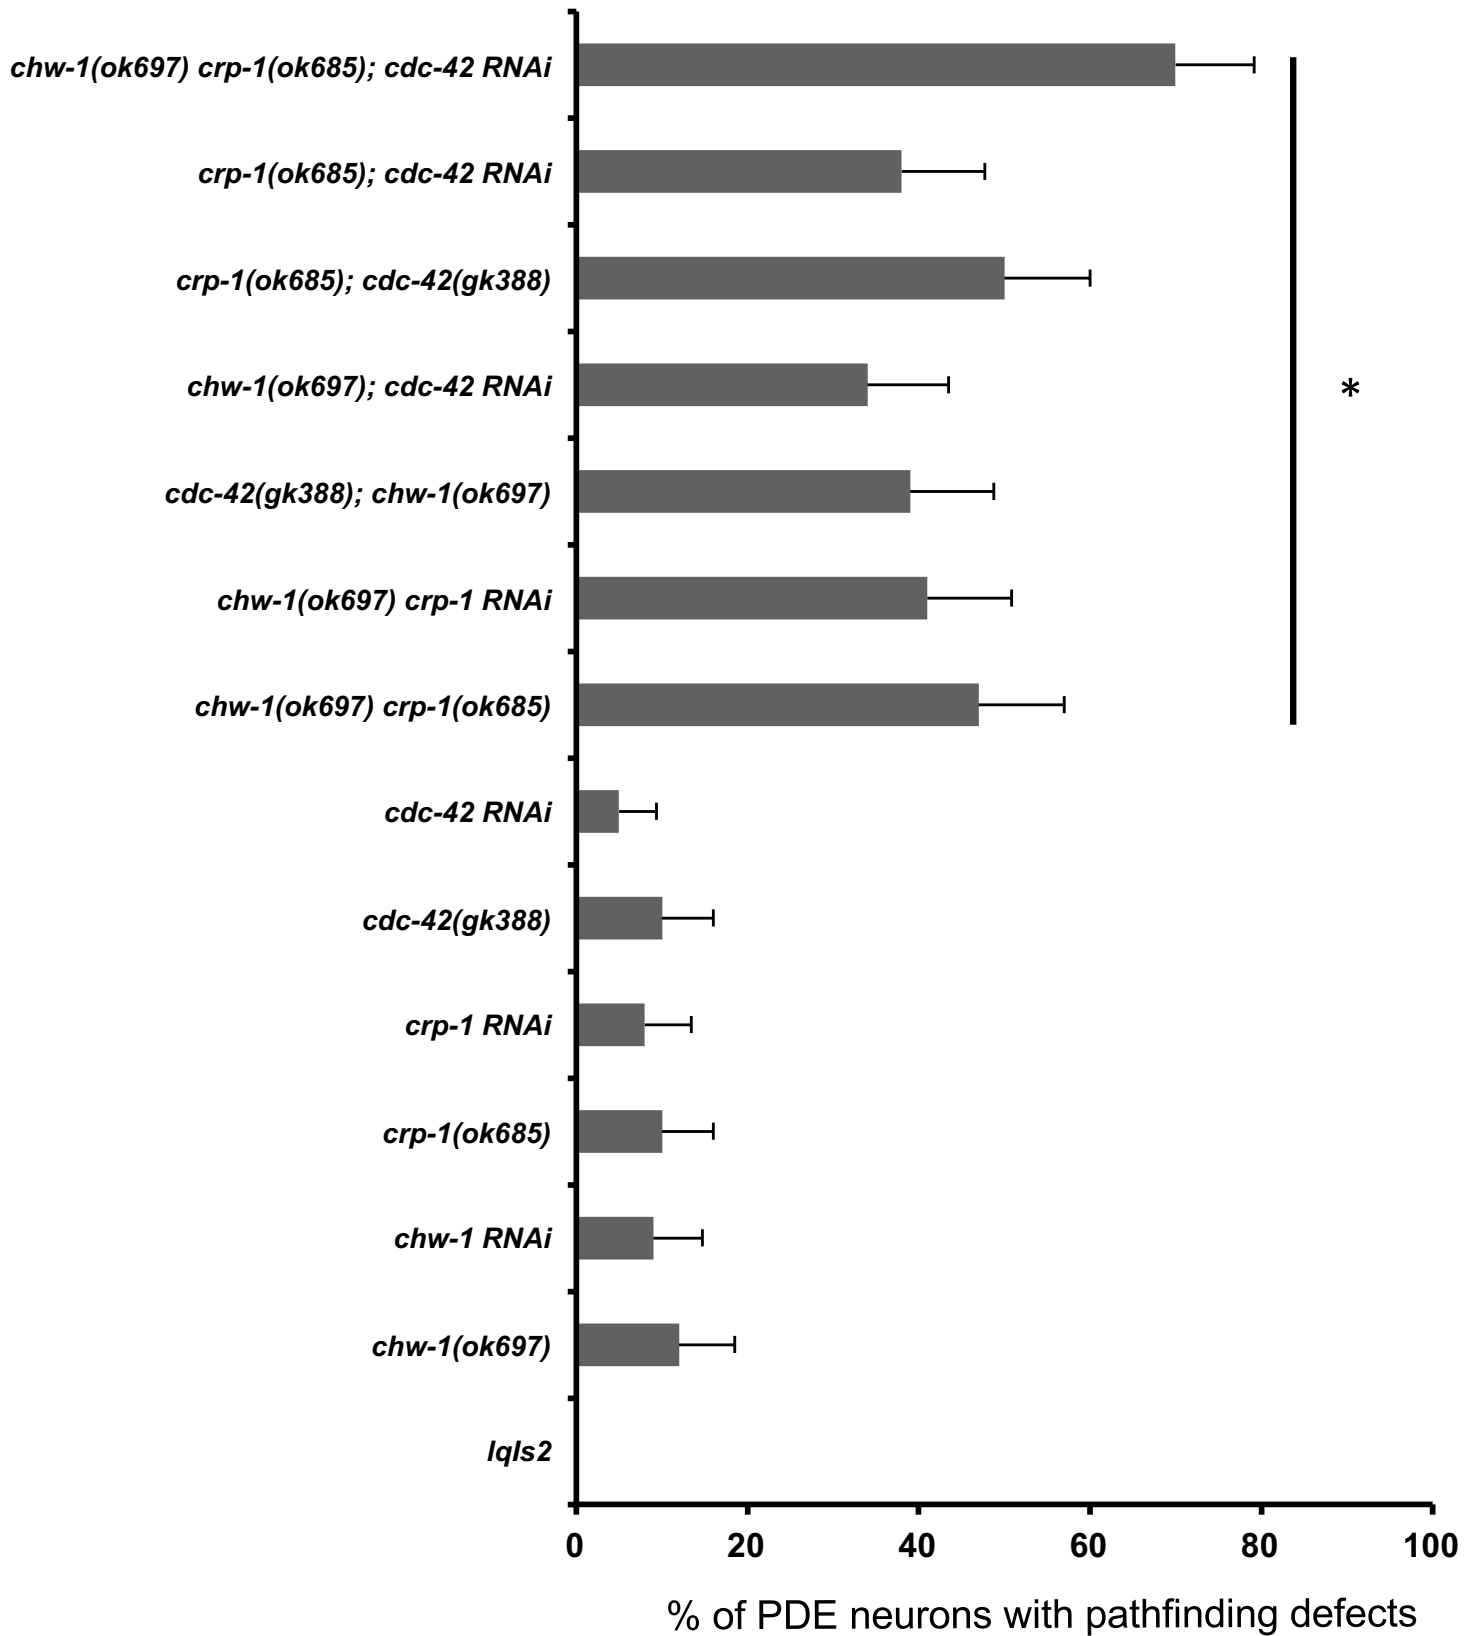

\*p<0.0001 n≥100

A

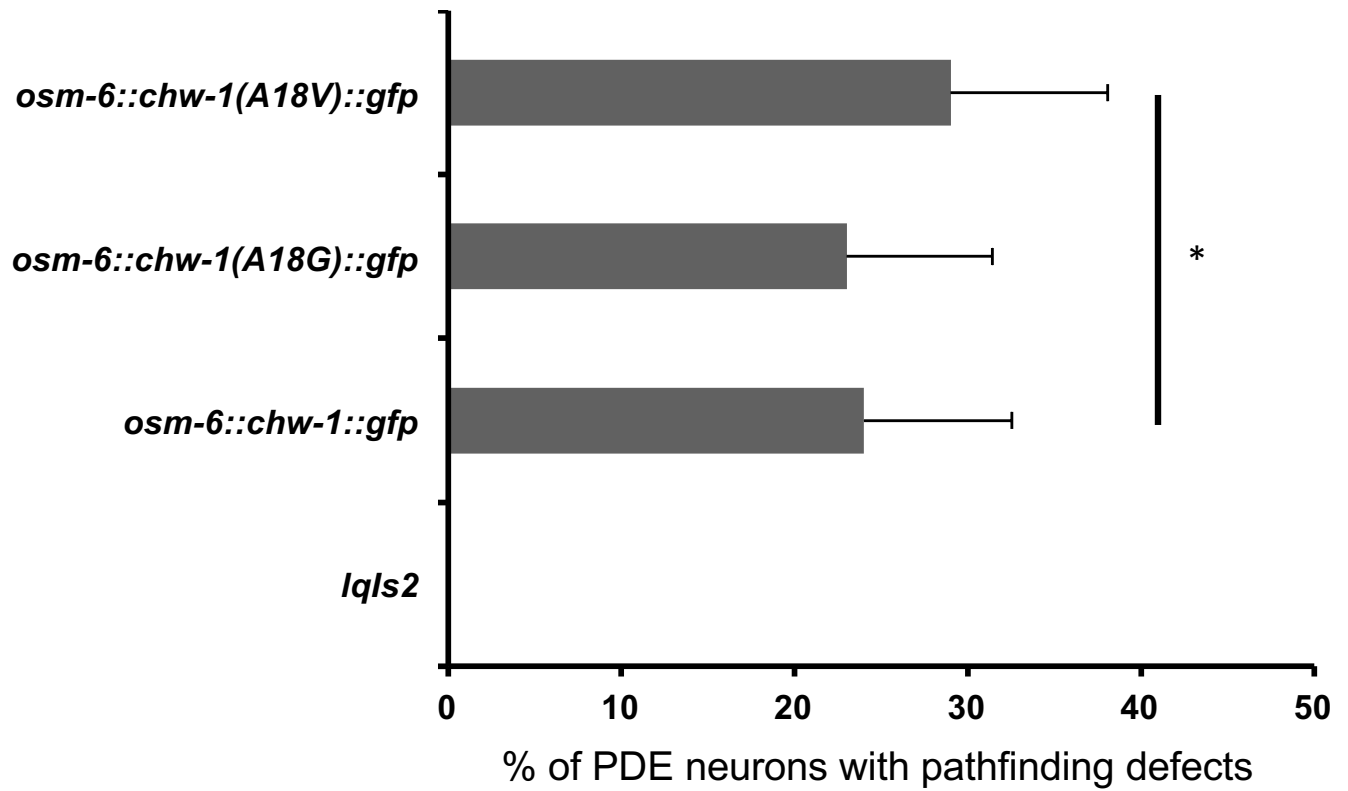

\* $p < 0.0001$   $n \geq 100$

B

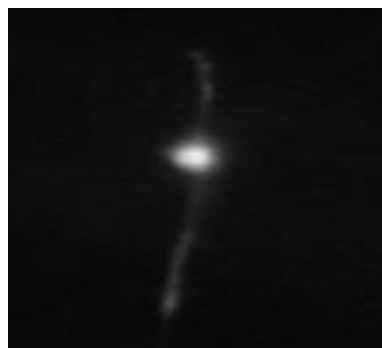

WT  
(*lqls2*)

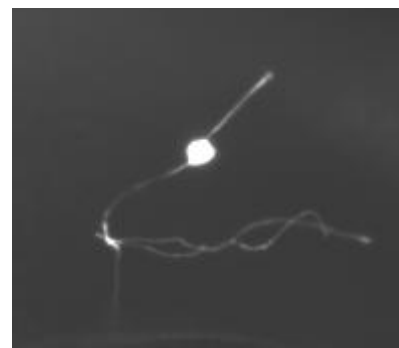

*osm-6::chw-1(A18G)*

A

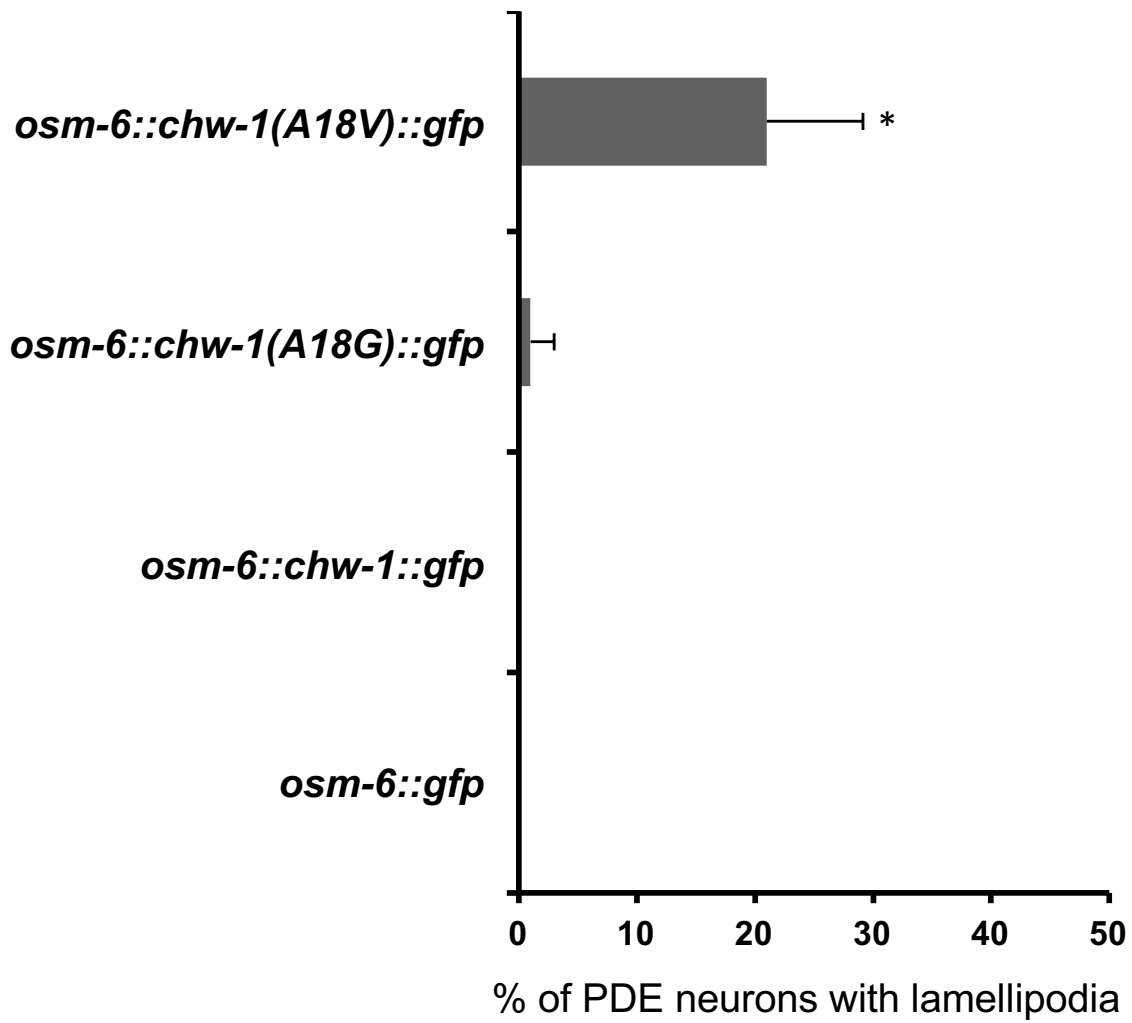

\* $p < 0.0001$   $n \geq 100$

B

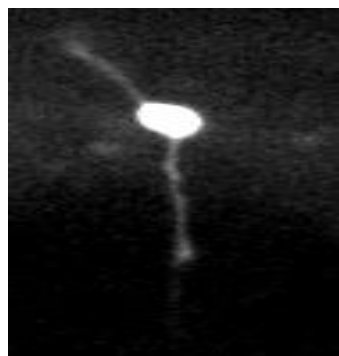

WT  
(*lqls2*)

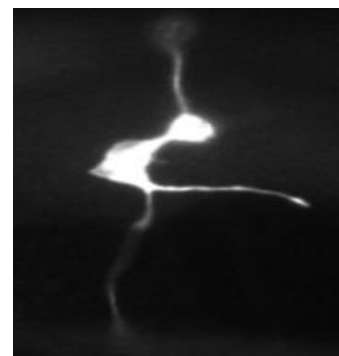

*osm-6::chw-1(A18V)*



**A**

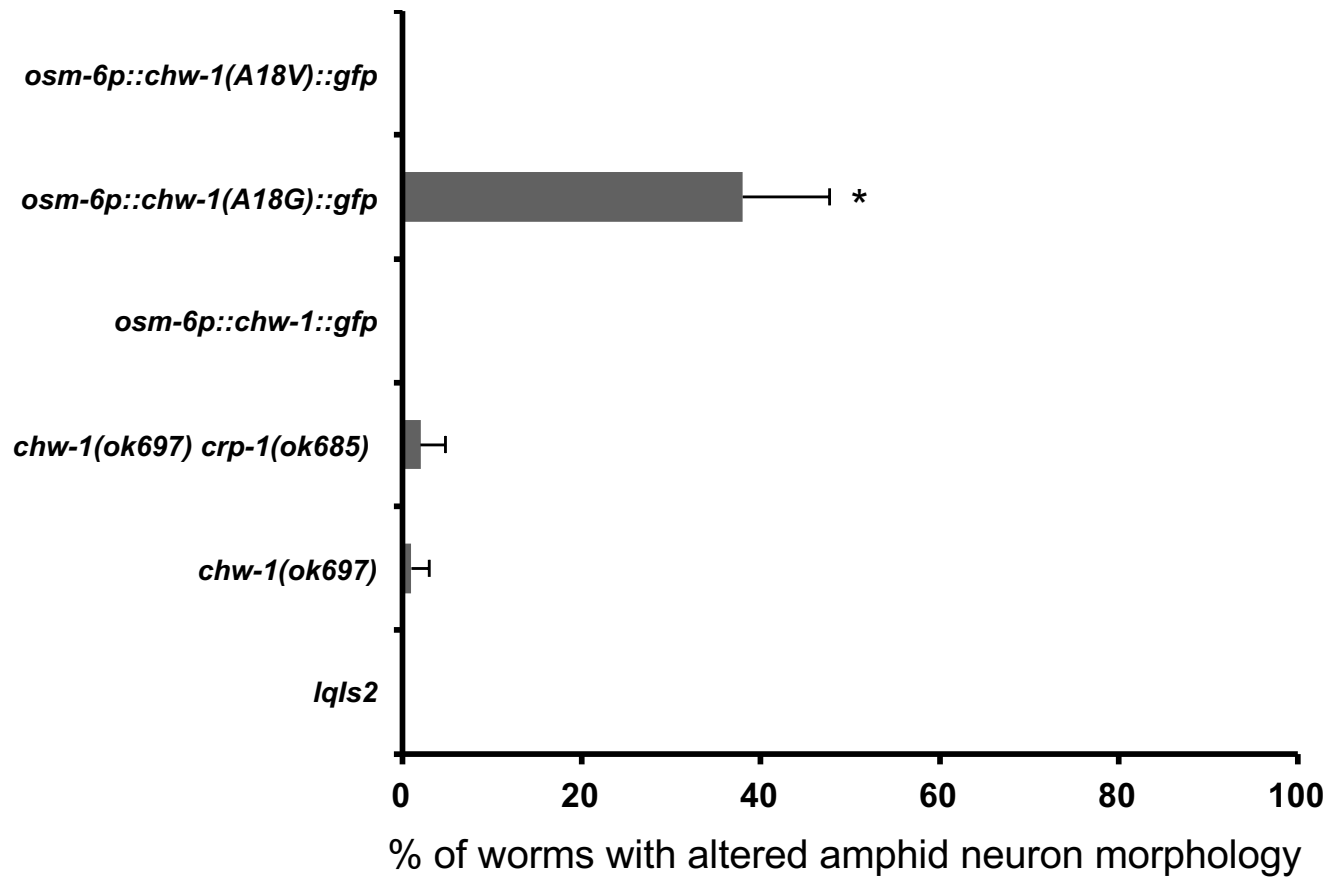

\* $p < 0.0001$   $n \geq 100$ ,

**B**

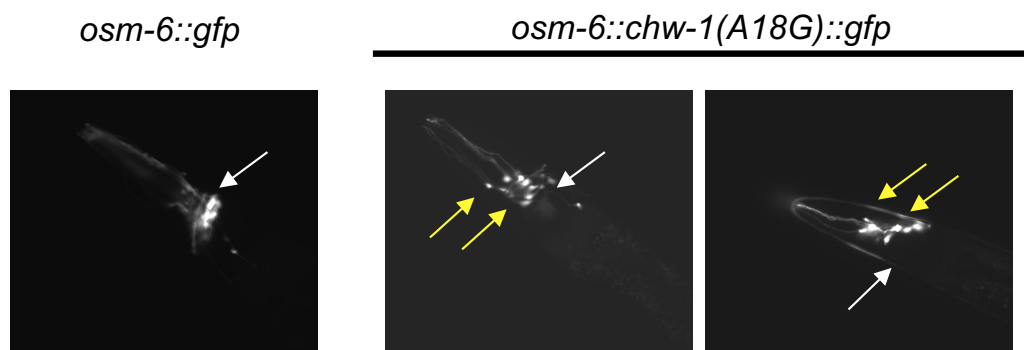

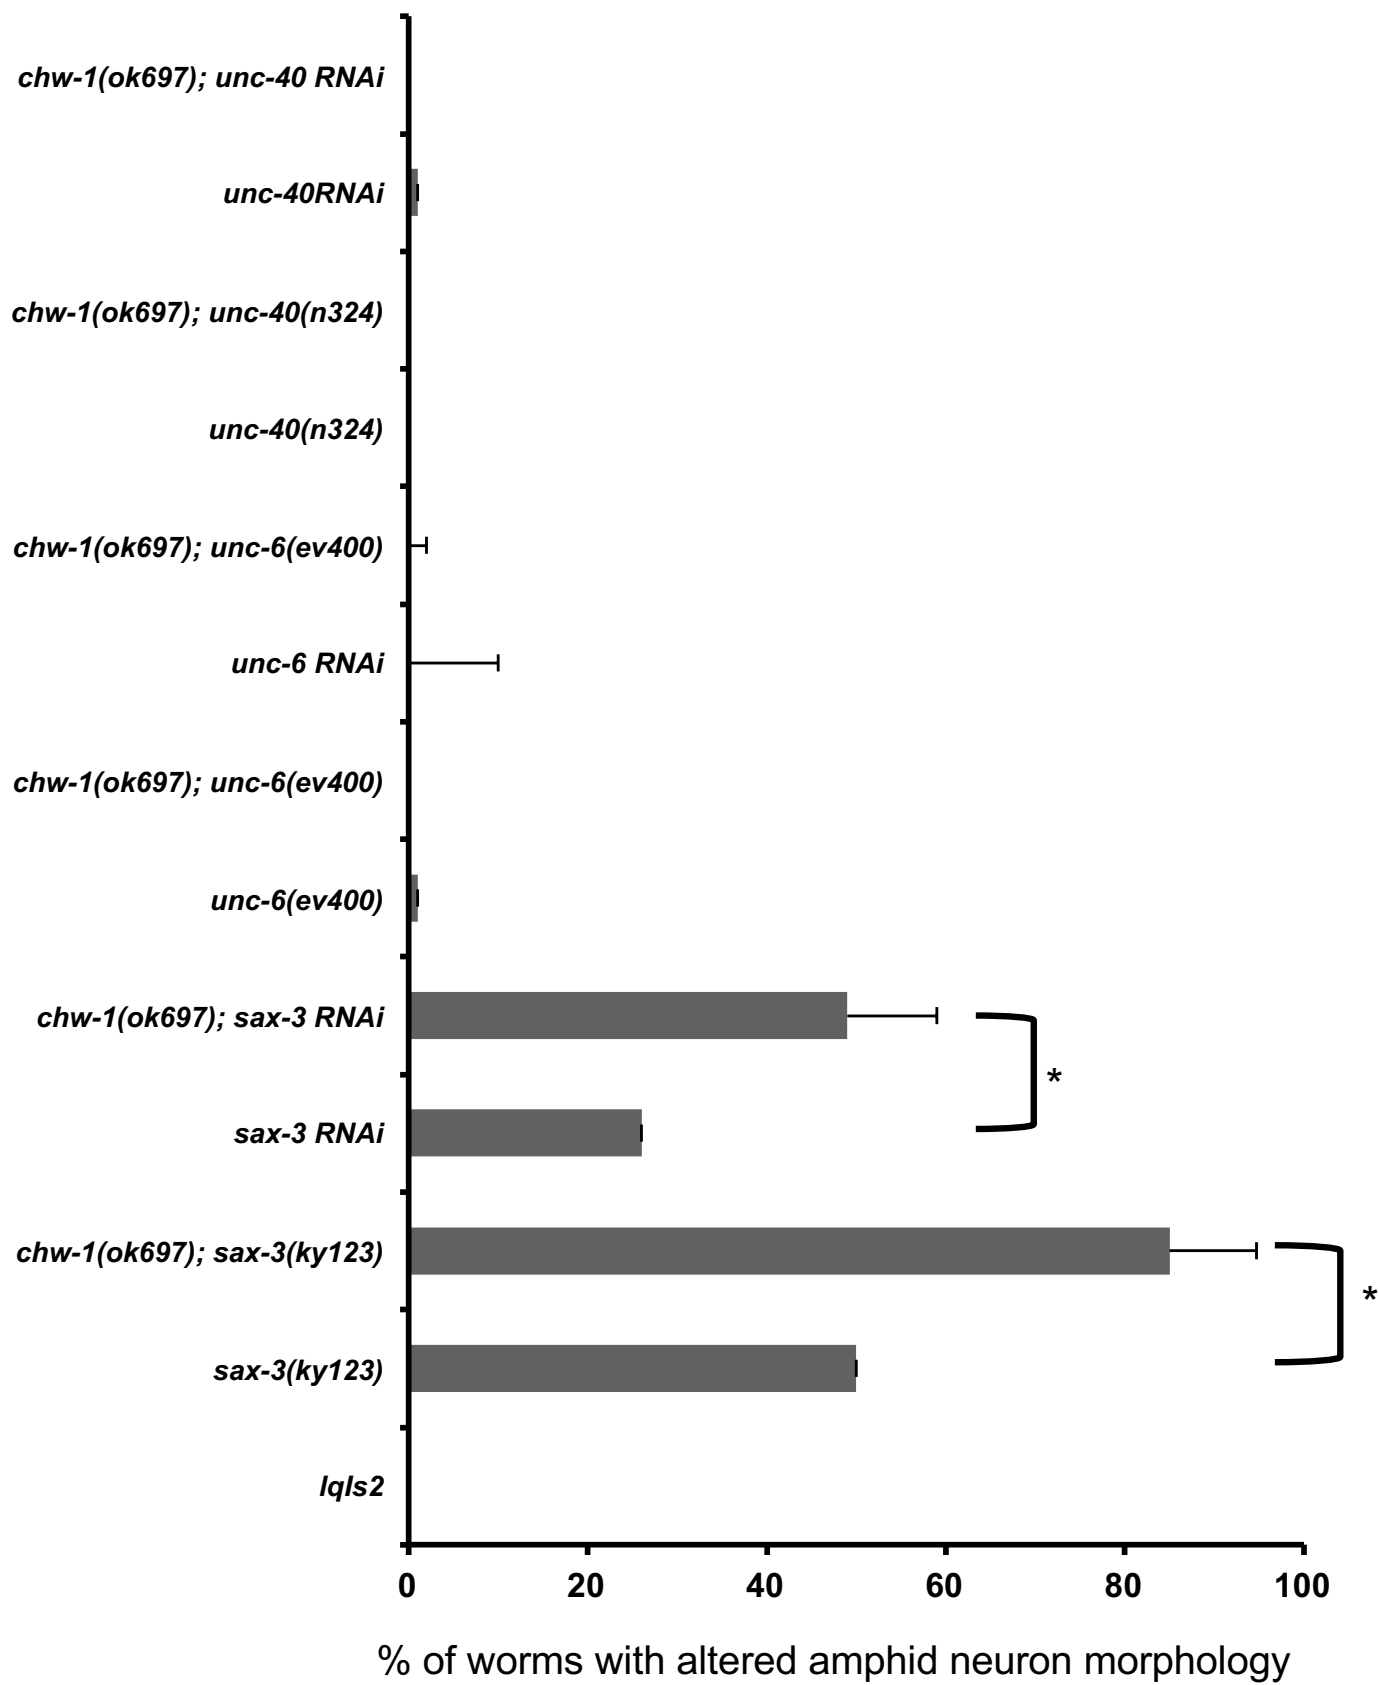

\*p<0.0001 n≥100,

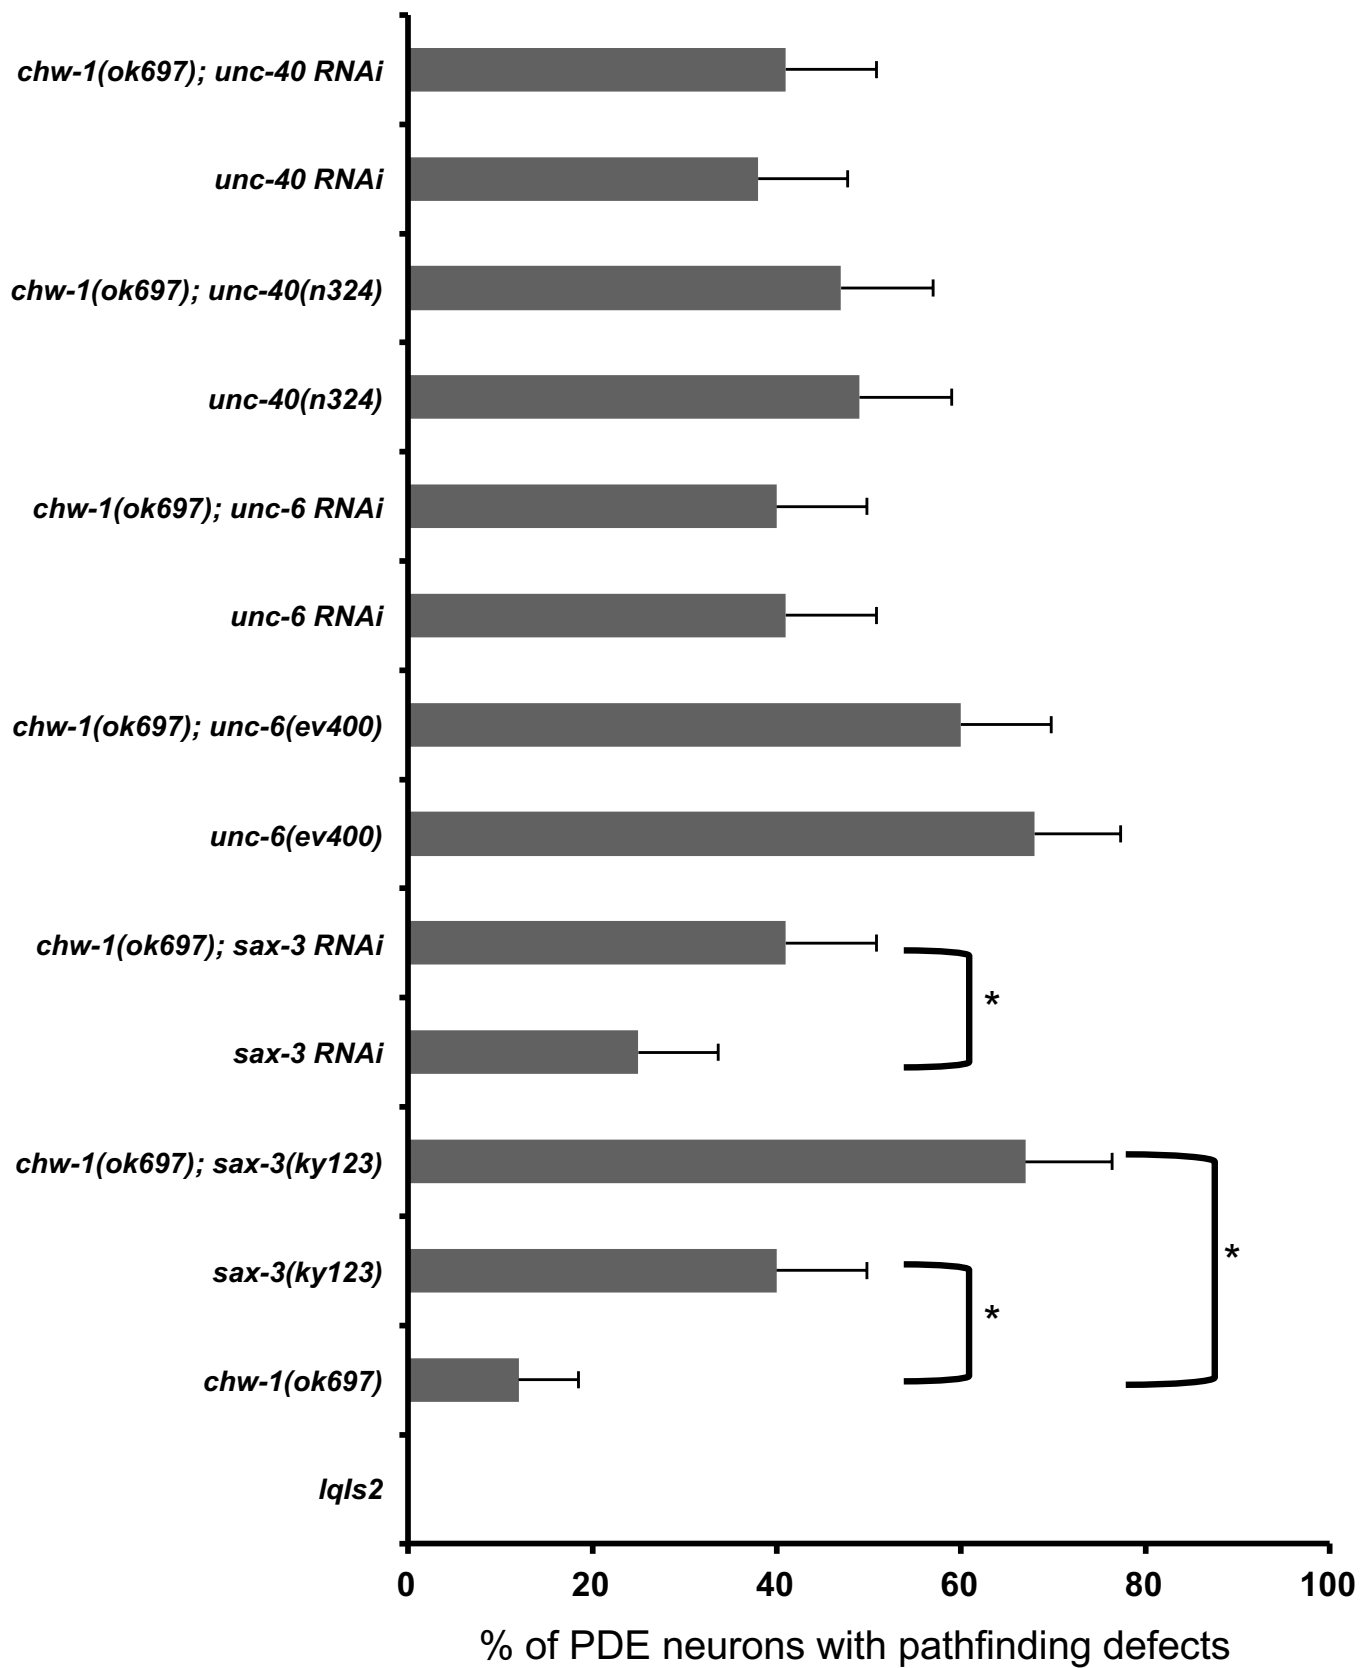

\*p<0.0001 n≥100

A

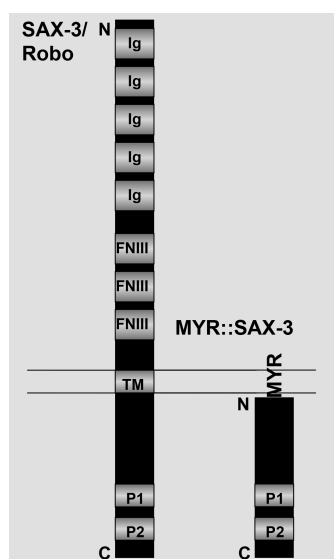

B

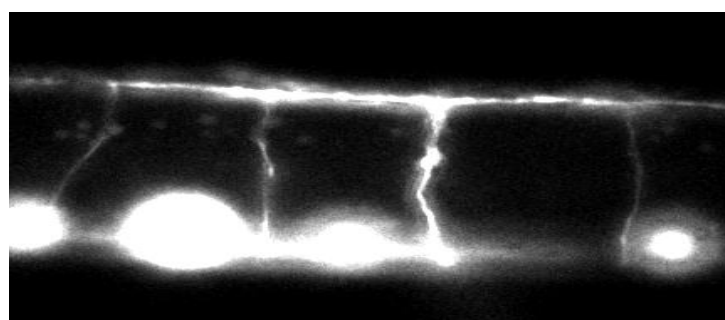

*unc-25::gfp*

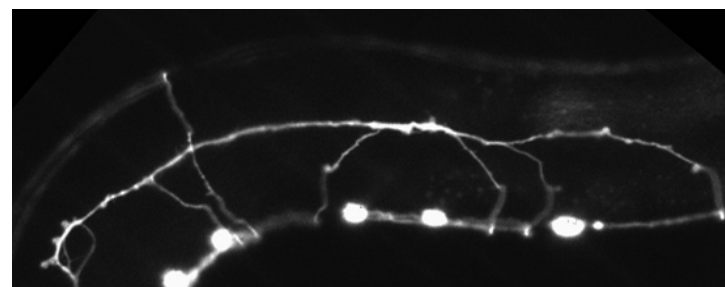

*unc-25::myr-sax-3::gfp*

C

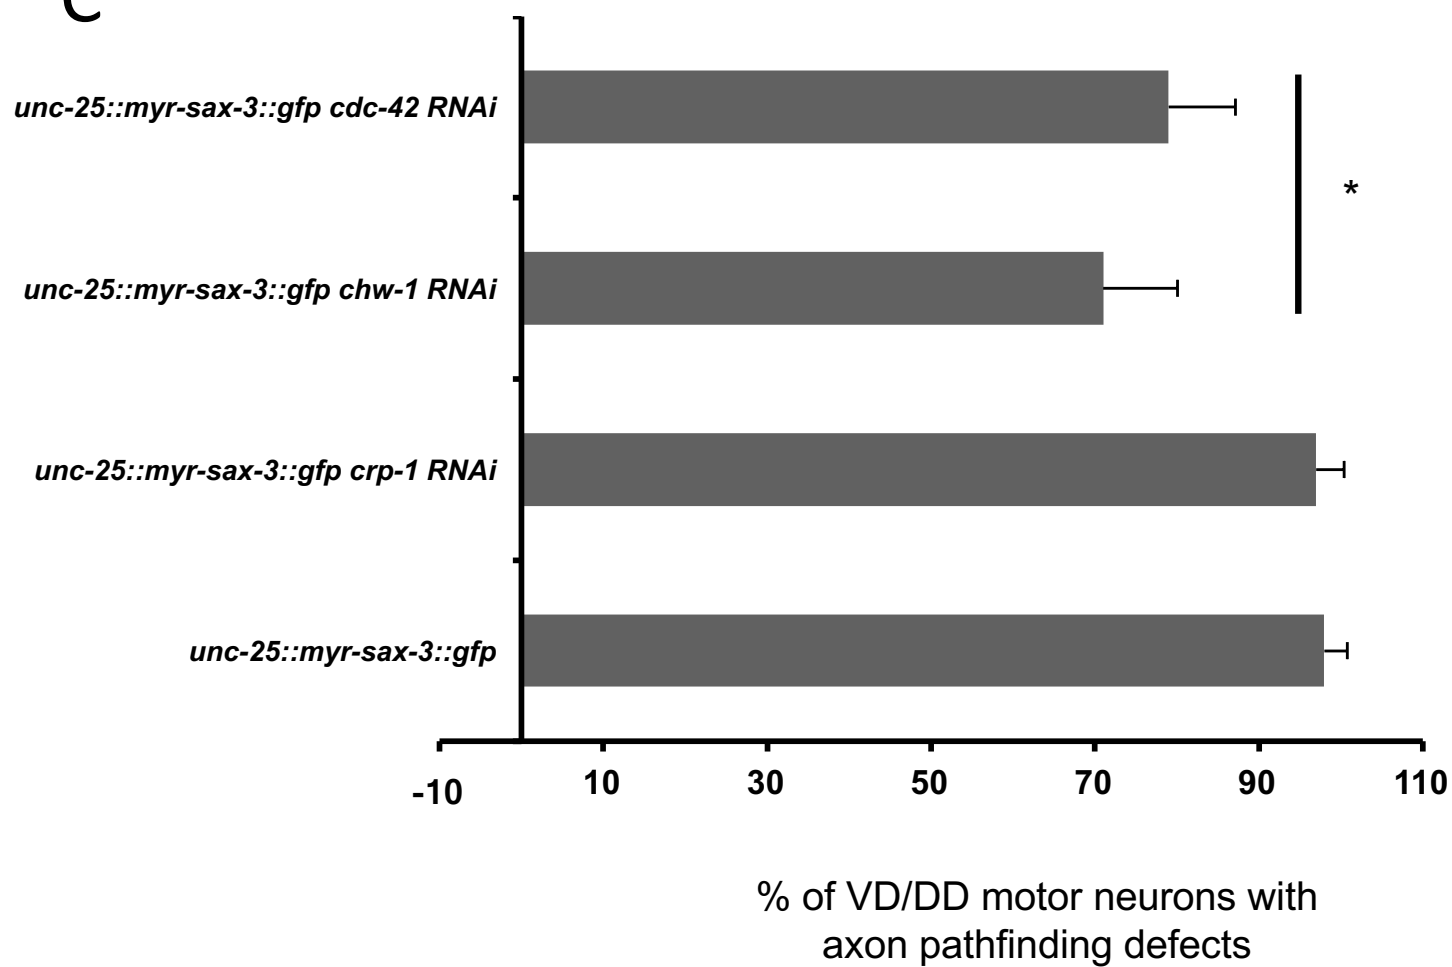

\*p<0.0004 n≥100
